# Supplementary material for: Nitrogen isotopic fractionations during nitric oxide production in an agricultural soil
Source: Copernicus journal article supplement (doi:10.5194/bg-2020-344), 2020-10-20
Supplement: Supplementary file [file bg-2020-344-AC1-supplement.pdf]

# Reply to Referee #1

We are grateful for the constructive comments and helpful suggestions of Referee #1. Below are detailed responses to all the comments and corresponding explanations of the revisions made to the manuscript. Line numbers cited in the replies (highlighted) refer to the revised manuscript document with tracked changes displayed (attached with this reply). Please also read the comments to Referee #2 (Dr. Wolfgang Wanek) for other revisions of the manuscript.

Dear authors, this was a pleasure to review your manuscript. It raises a very interesting topic of application of stable isotope studies for better understanding of soil N cycle. The manuscript presents a few of very original analytical approaches, like NO and NO<sub>2</sub><sup>-</sup> isotopic analyses (as one of the very first for soil studies) and application of D17O to trace NO<sub>3</sub> and NO<sub>2</sub> soil transformations. The combination of all the approaches and the construction of the NO isotope model is very complex and challenging to present in an understandable form, but authors managed this very well. The manuscript is well organised, the results are well documented and supplement contains a lot of additional information precious for the readers who will further apply or develop the presented approach.

**Reply:** We thank Referee #1 for the positive feedback.

**Comment 1:** I could have one suggestion of expanding the analytics, maybe useful for your future studies. Since you used Chilian NO<sub>3</sub> with the D17O anomaly you could also monitor this anomaly in NO<sub>2</sub><sup>-</sup> (this may be difficult due to low concentrations) or in NO or N<sub>2</sub>O. This would allow you to determine the extend O-exchange and no further consideration of two scenarios: with and without O-exchange will be needed. This will bring more clarity to the whole study. An example of using D17O of N<sub>2</sub>O to determine O-exchange can be found in Lewicka-Szczebak et al. (2016, BG).

**Reply:** We agree with the Referee that  $\Delta^{17}\text{O}$  analysis of NO<sub>2</sub><sup>-</sup> could provide valuable insights into the degree of oxygen isotope exchange between NO<sub>2</sub><sup>-</sup> and H<sub>2</sub>O during the anoxic incubation, thereby offering more constraints and confidence to the isotopic modeling. However, we had concerns about the feasibility of  $\Delta^{17}\text{O}$ -NO<sub>2</sub><sup>-</sup> analysis in this case because NO<sub>2</sub><sup>-</sup> in water samples can undergo oxygen isotope exchange with H<sub>2</sub>O during sample processing, preservation, and storage (e.g. even for samples frozen under -20°C) (Casciotti et al., 2007). Therefore, measuring soil NO<sub>2</sub><sup>-</sup> for its  $\Delta^{17}\text{O}$  values is not trivial, and will require comprehensive efforts to demonstrate its robustness throughout the sequence of soil extraction, extract processing, and sample storage. These efforts can be largely facilitated by development of  $\Delta^{17}\text{O}$ -NO<sub>2</sub><sup>-</sup> reference materials, which are currently lacking.

Analysis and interpretation of  $\Delta^{17}\text{O}$  of soil NO are confounded by the ozone oxidation of NO to NO<sub>2</sub> during the NO collection and the fact that NO<sub>2</sub> is collected in the triethanolamine (TEA) solution as both NO<sub>2</sub><sup>-</sup> and NO<sub>3</sub><sup>-</sup>. Therefore,  $\Delta^{17}\text{O}$  or  $\delta^{18}\text{O}$  of NO<sub>2</sub><sup>-</sup>/NO<sub>3</sub><sup>-</sup> collected from soil emitted-NO does not contain direct information about soil NO turnover. These technical aspects have been extensively discussed in our original method paper (Yu and Elliott, 2017).

We have revised the manuscript to include Lewicka-Szczebak et al. (2016) and to note that our understanding of NO<sub>2</sub><sup>-</sup> oxygen isotope exchange and reaction reversibility can benefit from robust soil  $\Delta^{17}\text{O}$ -NO<sub>2</sub><sup>-</sup> determination and calibration in the future (Line 569-575).

I have just a few very minor comments:

**Comment 2:** - Fig. 6 - do you assume that the abiotic NO cannot be further reduced to N<sub>2</sub>O?

**Reply:** Due to lack of direct observational constraints, we did not assume any specific production or consumption pathways for NO yield from abiotic NO<sub>2</sub><sup>-</sup> reactions in the isotopologue-specific model. As such, the model simulates net NO production, rather than gross rates. Specifically, based on the results from the abiotic incubation, we assumed that the net abiotic NO production from NO<sub>2</sub><sup>-</sup> followed a pseudo-first order kinetics with respect to NO<sub>2</sub><sup>-</sup> with an apparent stoichiometric coefficient for net NO production from NO<sub>2</sub><sup>-</sup> of 0.52 (Line 510-513 of the original manuscript). This modeling parameterization implicitly accounts for parallel or competing abiotic NO production pathways in the soil, as well as potential NO consumption through abiotic reactions (e.g., chemo-denitrification of NO to N<sub>2</sub>O; Line 365-380 of the original manuscript). In the revised manuscript, we have revised Fig 6 and its caption to clarify that the modeled abiotic NO production represents net NO yield, rather than gross NO production.

**Comment 3:** - L 609 - what do you mean here with "modified isotopologue-specific model" - this term was not used before in the manuscript and it is not clear if you just refer to the presented NO isotope model or sth else

**Reply:** It is mentioned in the original manuscript that the isotopologue-specific model we used to simulate co-occurring denitrification and NO<sub>2</sub><sup>-</sup> re-oxidation was modified from a model of co-occurring nitrification and NO<sub>3</sub><sup>-</sup> consumption we developed previously for well-aerated soils (Line 492-495 of the original manuscript). We have removed "modified" here to prevent any confusion.

**Comment 4:** - L 624 - what is "more normal" isotope effect?

**Reply:** In this study, we follow the convention to define kinetic isotope effect (Line 78-82 of the original manuscript). Under this definition, a normal kinetic isotope effect occurs when reaction rate constant of light isotopologues is higher than that of heavy isotopologues. Thus, normal kinetic isotope effects are expressed by positive eta ( $\eta$ ) values in this study, in opposition to inverse kinetic isotope effects, which have negative  $\eta$  values. Here, our estimated isotope effect for nitric oxide reduction ( $^{15}\eta_{\text{NOR}}$ ) is between -8‰ and 2‰, higher than the previously reported  $^{15}\eta_{\text{NOR}}$  for fungal nitric oxide reductase (i.e. -14‰). We have revised the manuscript to clarify that "more normal" is used here to describe our estimated  $^{15}\eta_{\text{NOR}}$  being closer to zero (Line 631).

**Comment 5:** - Section 4.3 - I wonder why you do not consider NO<sub>2</sub><sup>-</sup> oxidation to NO<sub>3</sub><sup>-</sup> for oxic and suboxic conditions. If this process was so intensive under anoxic conditions, why it should not be active under oxic and suboxic conditions?

**Reply:** We did not explicitly consider aerobic NO<sub>2</sub><sup>-</sup> oxidation to NO<sub>3</sub><sup>-</sup> under oxic and hypoxic conditions because NO<sub>2</sub><sup>-</sup> concentration was below the detection limit in both incubations (Line 315-317 of the original manuscript), suggesting that the two steps of nitrification (i.e. NH<sub>4</sub><sup>+</sup> oxidation to NO<sub>2</sub><sup>-</sup> and NO<sub>2</sub><sup>-</sup> oxidation to NO<sub>3</sub><sup>-</sup>) were tightly coupled under these conditions (Line 651-653 of the original manuscript). Therefore, in the isotopologue-specific model of co-occurring nitrification and NO<sub>3</sub><sup>-</sup> consumption, the two nitrification steps were lumped into a gross flux of NH<sub>4</sub><sup>+</sup> oxidation to NO<sub>3</sub><sup>-</sup> (Line 655-659 of the original manuscript; Text S5 in the Supplement) (Yu and Elliott, 2018). The excellent agreement between the modeled and

measured data (i.e.,  $\text{NH}_4^+$  and  $\text{NO}_3^-$  concentrations and  $\Delta^{17}\text{O}-\text{NO}_3^-$ ; Figure 3) under both oxic and hypoxic conditions confirms that this model configuration is appropriate.

The NXR-catalyzed anaerobic  $\text{NO}_2^-$  re-oxidation and/or  $\text{NO}_3^-/\text{NO}_2^-$  interconversion, which prevailed in the anoxic incubation, are considered not important in the oxic and hypoxic incubations. The results from the anoxic incubation, together with findings from previous studies (e.g. Wunderlich et al., 2013), suggest that  $\text{NO}_2^-$  accumulation coupled with  $\text{O}_2$  deprivation is the key trigger of anaerobic  $\text{NO}_2^-$  re-oxidation by nitrite-oxidizing bacteria (NOB). This point has been emphasized in multiple places throughout the manuscript (Line 502-505, 598-604, and 839-846 of the original manuscript). The lack of  $\text{NO}_2^-$  accumulation in the oxic and hypoxic incubations suggests that NOB mainly performed aerobic  $\text{NO}_2^-$  oxidation to gain energy.

## References

- Casciotti, K.L., Böhlke, J.K., Mclvin, M.R., Mroczkowski, S.J. and Hannon, J.E., 2007. Oxygen isotopes in nitrite: Analysis, calibration, and equilibration. *Analytical Chemistry*, 79(6), pp.2427-2436.
- Lewicka-Szczebak D., Dyckmans J., Kaiser J., Marca A., Augustin J. and Well R.: Oxygen isotope fractionation during  $\text{N}_2\text{O}$  production by soil denitrification. *Biogeosciences*, 13, 1129-1144, 2016.
- Yu, Z. and Elliott, E.M., 2017. Novel method for nitrogen isotopic analysis of soil-emitted nitric oxide. *Environmental Science & Technology*, 51(11), pp.6268-6278.
- Yu, Z. and Elliott, E.M., 2018. Probing soil nitrification and nitrate consumption using  $\Delta^{17}\text{O}$  of soil nitrate. *Soil Biology and Biochemistry*, 127, pp.187-199.

# Nitrogen isotopic fractionations during nitric oxide production in an agricultural soil

Zhongjie Yu<sup>1,2</sup> and Emily M. Elliott<sup>1</sup>

<sup>1</sup>Department of Geology and Environmental Science, University of Pittsburgh, Pittsburgh, Pennsylvania 15260, USA

<sup>2</sup>Department of Natural Resources and Environmental Sciences, University of Illinois Urbana-Champaign, Urbana, Illinois 61801, USA.

Correspondence to: Zhongjie Yu (zjyu@illinois.edu)

**Abstract.** Nitric oxide (NO) emissions from agricultural soils play a critical role in atmospheric chemistry and represent an important pathway for loss of reactive nitrogen (N) to the environment. With recent methodological advances, there is growing interest in the natural abundance N isotopic composition ( $\delta^{15}\text{N}$ ) of soil-emitted NO and its utility in providing mechanistic information on soil NO dynamics. However, interpretation of soil  $\delta^{15}\text{N}$ -NO measurements has been impeded by the lack of constraints on the isotopic fractionations associated with NO production and consumption in relevant microbial and chemical reactions. In this study, anoxic (0%  $\text{O}_2$ ), oxic (20%  $\text{O}_2$ ), and hypoxic (0.5%  $\text{O}_2$ ) incubations of an agricultural soil were conducted to quantify the net N isotope effects ( $^{15}\eta$ ) for NO production in denitrification, nitrification, and abiotic reactions of nitrite ( $\text{NO}_2^-$ ) using a newly developed  $\delta^{15}\text{N}$ -NO analysis method. A sodium nitrate ( $\text{NO}_3^-$ ) containing mass-independent oxygen-17 excess (quantified by a  $\Delta^{17}\text{O}$  notation) and three ammonium ( $\text{NH}_4^+$ ) fertilizers spanning a  $\delta^{15}\text{N}$  gradient were used in soil incubations to help illuminate the reaction complexity underlying NO yields and  $\delta^{15}\text{N}$  dynamics in a heterogeneous soil environment. We found strong evidence for the prominent role of  $\text{NO}_2^-$  re-oxidation under anoxic conditions in controlling the apparent  $^{15}\eta$  for NO production from  $\text{NO}_3^-$  in denitrification (i.e., 49 to 60‰). These results highlight the importance of an under-recognized mechanism for the reversible enzyme  $\text{NO}_2^-$  oxidoreductase to control the N isotope distribution between the denitrification products. Through a  $\Delta^{17}\text{O}$ -based modeling of co-occurring denitrification and  $\text{NO}_2^-$  re-oxidation, the  $^{15}\eta$  for  $\text{NO}_2^-$  reduction to NO and NO reduction to nitrous oxide ( $\text{N}_2\text{O}$ ) were constrained to be 15 to 22‰ and -8 to 2‰, respectively. Production of NO in the oxic and hypoxic incubations was contributed by both  $\text{NH}_4^+$  oxidation and  $\text{NO}_3^-$  consumption, with both processes having a significantly higher NO yield under  $\text{O}_2$  stress. Under both oxic and hypoxic conditions, NO production from  $\text{NH}_4^+$  oxidation proceeded with a large  $^{15}\eta$  (i.e., 55 to 84‰) possibly due to expression of multiple enzyme-level isotopic fractionations during  $\text{NH}_4^+$  oxidation to  $\text{NO}_2^-$  that involves NO as either a metabolic byproduct or an obligatory intermediate for  $\text{NO}_2^-$  production. Adding  $\text{NO}_2^-$  to sterilized soil triggered substantial NO production, with a relatively small  $^{15}\eta$  (19‰). Applying the estimated  $^{15}\eta$  values to a previous  $\delta^{15}\text{N}$  measurement of in situ soil  $\text{NO}_x$  emission ( $\text{NO}_x = \text{NO} + \text{NO}_2$ ) provided promising evidence for the potential of  $\delta^{15}\text{N}$ -NO measurements in revealing NO production pathways. Based on the observational and modeling constraints obtained in this study, we suggest that simultaneous  $\delta^{15}\text{N}$ -NO and  $\delta^{15}\text{N}$ - $\text{N}_2\text{O}$  measurements can lead to unprecedented insights into the sources of and processes controlling NO and  $\text{N}_2\text{O}$  emissions from agricultural soils.

## 1 Introduction

Agricultural production of food has required a tremendous increase in the application of nitrogen (N) fertilizers since 1960s (Davidson, 2009). In order to maximize crop yields, N fertilizers are often applied in excess to agricultural soils, resulting in loss of reactive N to the environment (Galloway et al., 2003). Loss of N in the form of gaseous nitric oxide (NO) has long been recognized for its adverse impacts on air quality and human health (Veldkamp and Keller, 1997). Once emitted to the atmosphere, NO is rapidly oxidized to nitrogen dioxide (NO<sub>2</sub>), and these compounds (collectively referred to NO<sub>x</sub>) drive production and deposition of atmospheric nitrate (NO<sub>3</sub><sup>-</sup>) (Calvert et al., 1985) and play a critical role in the formation of tropospheric ozone (O<sub>3</sub>) – a toxic air pollutant and potent greenhouse gas (Crutzen, 1979). Despite the observations that emission of NO from agricultural soils can sometimes exceed that of nitrous oxide (N<sub>2</sub>O) – a climatically important trace gas primarily produced from reduction of NO in soils (Liu et al., 2017), NO is frequently overlooked in soil N studies due to its high reactivity and transient presence relative to N<sub>2</sub>O (Medinets et al., 2015). Consequently, the contribution of soil NO emission to contemporary NO<sub>x</sub> inventories at regional to global scales is highly uncertain (e.g., ranging from 3% to >30%) (Hudman et al., 2010; Vinken et al., 2014) and remains the subject of much current debate (Almaraz et al., 2018; Maaz et al., 2018).

As the “central hub” of the biogeochemical N cycle, NO can be produced and consumed in numerous microbial and chemical reactions in soils (Medinets et al., 2015). Among these processes, nitrification and denitrification are the primary sources responsible for NO emission from N-enriched agricultural soils (Firestone and Davidson, 1989). Denitrification is the sequential reduction of NO<sub>3</sub><sup>-</sup> and nitrite (NO<sub>2</sub><sup>-</sup>) to NO, N<sub>2</sub>O, and dinitrogen (N<sub>2</sub>) and can be mediated by a diversity of soil heterotrophic microorganisms (Zumft, 1997). The enzymatic system of denitrification comprises a series of dedicated reductases whereby NO<sub>2</sub><sup>-</sup> reductase (NIR) and NO reductase (NOR) are the key enzymes that catalyze production and reduction of NO, respectively (Ye et al., 1994). As such, NO is often viewed as a free intermediate of the denitrification process (Russow et al., 2009). In comparison, nitrification is a two-step aerobic process, in which oxidation of ammonia (NH<sub>3</sub>) to NO<sub>2</sub><sup>-</sup> is mediated by ammonia-oxidizing bacteria (AOB) or archaea (AOA), while the subsequent oxidation of NO<sub>2</sub><sup>-</sup> to NO<sub>3</sub><sup>-</sup> is performed by nitrite-oxidizing bacteria (NOB) (Lehnert et al., 2018). Although production of NO during the nitrification process has been linked to NH<sub>3</sub> oxidation (Hooper et al., 2005; Caranto et al., 2017) and NO<sub>2</sub><sup>-</sup> reduction by AOB/AOA-encoded NIR (Wrage-Mönning et al., 2018), the metabolic role of NO in AOB and AOA remains ambiguous, making it difficult to elucidate the enzymatic pathways driving NO release by nitrification (Beeckman et al., 2018; Stein, 2019). Additionally, NO can also be produced from abiotic reactions involving soil NO<sub>2</sub><sup>-</sup> or its protonated form – nitrous acid (HNO<sub>2</sub>) (Venterea et al., 2005; Lim et al., 2018). However, despite empirical evidence for the dependence of soil NO emission on soil N availability and moisture content (Davidson and Verchot, 2000), the source contribution of soil NO emission across temporal and spatial scales is poorly understood (Hudman et al., 2012). This is largely due to the lack of a robust means for source partitioning soil-emitted NO under dynamic environmental conditions.

Natural abundance stable N and oxygen (O) isotopes in N-containing molecules have long provided insights into the sources and relative rates of biogeochemical processes comprising the N cycle (Granger and

Wankel, 2016). The unique power of stable isotope ratio measurements stems from the distinct partitioning of isotopes between chemical species or phases, known as isotopic fractionation. Thus, in order to extract the greatest information from the distributions of isotopic species, a rigorous understanding of the direction and magnitude of isotopic fractionations associated with each relevant transformation is required. Both kinetic and equilibrium isotope effects can lead to isotopic fractionations between N-bearing compounds in soils (Granger and Wankel, 2016; Denk et al., 2017). During kinetic processes, isotopic fractionation occurs as a result of differences in the reaction rates of isotopically substituted molecules (i.e. isotopologues), leading to either enrichment or, in a few rare cases, depletion of heavy isotopes in the reaction substrate (Fry, 2006; Casciotti, 2009). The degree of kinetic isotope fractionation can be quantified by a kinetic isotope fractionation factor ( $\alpha_k$ ), which is often represented by the ratio of reaction rate constants of light isotopes-isotopologues to that of heavy isotopes-isotopologues. In this definition,  $\alpha_k$  is larger than 1 for a normal kinetic isotope fractionation. For equilibrium reactions, equilibrium isotope fractionation arises from differences in the zero-point energies of two species undergoing isotopic exchange, leading to enrichment of heavy isotopes in the more strongly bonded form (Fry, 2006; Casciotti, 2009). In this case, the isotope ratios of two species at equilibrium are defined by an equilibrium isotope fractionation factor ( $\alpha_{eq}$ ), which is also related to the kinetic isotope fractionation factors of forward and backward equilibrium reactions (Fry, 2006). By convention, isotopic fractionation can be expressed in units of per mille (‰) as an isotope effect ( $\epsilon$ ):  $\epsilon = (\alpha - 1) \times 1000$ . Nevertheless, in a heterogeneous soil environment, expression of intrinsic kinetic and equilibrium isotope effects for biogeochemical N transformations is often limited due to transport limitation in soil substrates, the multi-step nature of transformation processes, as well as presence of diverse soil microbial communities that transform N via parallel and/or competing reaction pathways (Maggi and Riley, 2010). As such, interpretation of N isotope distribution in soils has largely relied on measuring net isotope effects ( $\eta$ ), which are often characterized by incubating soil samples under environmentally relevant conditions, that favor expression of intrinsic isotope effects for specific N transformations (Lewicka-Szczebak et al. 2014). For example, it has been shown that the net N isotope effects for N<sub>2</sub>O production in soil nitrification, denitrification, and abiotic reactions are distinctively different under certain soil conditions (Denk et al., 2017), rendering natural abundance N isotopes of N<sub>2</sub>O a useful index for inferring sources of N<sub>2</sub>O in agricultural soils (Toyoda et al., 2017).

While the isotopic dynamics underlying soil N<sub>2</sub>O emissions has been extensively studied, there has been little investigation into the N isotopic composition (notated as  $\delta^{15}\text{N}$  in units of ‰;  $\delta = ((R_{\text{sample}}/R_{\text{standard}})-1) \times 1000$ ) of soil-emitted NO due to measurement difficulties (Yu and Elliott, 2017). Using a tubular denuder that trapped NO released from urea and ammonium (NH<sub>4</sub><sup>+</sup>)-fertilized soils, Li and Wang (2008) revealed a gradual increase in  $\delta^{15}\text{N}$ -NO from -49 to -19‰ and simultaneous <sup>15</sup>N enrichment in soil NH<sub>4</sub><sup>+</sup> and NO<sub>3</sub><sup>-</sup> over a two-week laboratory incubation. Similar  $\delta^{15}\text{N}$  variations (i.e., -44 to -14‰) were recently reported for in situ soil NO<sub>x</sub> emission in a manure-fertilized cornfield (Miller et al., 2018). Moreover, the magnitude of  $\delta^{15}\text{N}$ -NO<sub>x</sub> measured in this study depended on manure application methods, implying that NO<sub>x</sub> was mainly sourced from nitrification of manure-derived NH<sub>4</sub><sup>+</sup> (Miller et al., 2018). Based on a newly developed soil NO collection system that quantitatively converts soil-emitted NO to NO<sub>2</sub> for collection in triethanolamine (TEA) solutions, our previous work demonstrated substantial variations in  $\delta^{15}\text{N}$ -NO (-54 to -37‰) in connection with changes in moisture content in a forest soil (Yu

110 and Elliott, 2017). Furthermore, the measured in situ  $\delta^{15}\text{N}$ -NO values spanned a wide range (-60 to -23‰) and were highly sensitive to added N substrates (i.e.,  $\text{NH}_4^+$ ,  $\text{NO}_3^-$ , and  $\text{NO}_2^-$ ), indicating that NO produced from different sources may bear distinguishable  $\delta^{15}\text{N}$  imprints (Yu and Elliott, 2017). Nevertheless, despite the potential of  $\delta^{15}\text{N}$ -NO measurements in providing mechanistic information on soil NO dynamics, interpretation of  $\delta^{15}\text{N}$ -NO has been largely impeded by the knowledge gap as to how  $\delta^{15}\text{N}$ -NO is controlled by N isotopic fractionations during NO  
115 production and consumption in soils.

To this end, we conducted a series of controlled incubation experiments to quantify the net N isotope effects for NO production in an agricultural soil. Replicate soil incubations were conducted to measure the yield and  $\delta^{15}\text{N}$  of soil-emitted NO under anoxic (0%  $\text{O}_2$ ), oxic (20%  $\text{O}_2$ ), and hypoxic (0.5%  $\text{O}_2$ ) conditions, respectively. A sodium  $\text{NO}_3^-$  fertilizer mined in the Atacama Desert, Chile (Yu and Elliott, 2018) was used to amend the soil in all  
120 three incubation experiments. This Chilean  $\text{NO}_3^-$  originated from atmospheric deposition and thus contained an anomalous  $^{17}\text{O}$  excess (quantified by ~~a-the~~  $\Delta^{17}\text{O}$  notation) as a result of mass-independent isotopic fractionations during its photochemical formation in the atmosphere (Michalski et al., 2004). Because isotopic fractionations during biogeochemical  $\text{NO}_3^-$  production and consumption are mass-dependent,  $\Delta^{17}\text{O}$ - $\text{NO}_3^-$  is a conservative tracer of gross nitrification and  $\text{NO}_3^-$  consumption and provides a quantitative benchmark for disentangling isotopic  
125 overprinting on  $\delta^{15}\text{N}$ - $\text{NO}_3^-$  and  $\delta^{18}\text{O}$ - $\text{NO}_3^-$  during co-occurring nitrification and denitrification (Yu and Elliott, 2018) (see Text S1 in the Supplement for more details). As additional tracers, three isotopically different  $\text{NH}_4^+$  fertilizers were used in parallel treatments of the oxic and hypoxic incubations to quantify the nitrifier source contribution of NO production with changing  $\text{O}_2$  availability. By integrating multi-species measurements of N and O isotopes in an isotopologue-specific modeling framework, we were able for the first time to unambiguously link the yield and  $\delta^{15}\text{N}$   
130 variations of soil-emitted NO to nitrification and denitrification carried out by whole soil microbial communities and to characterize the net isotope effects for NO production from soil  $\text{NO}_3^-$ ,  $\text{NH}_4^+$ , and  $\text{NO}_2^-$  under different redox conditions. The quantified isotope effects are discussed in the context of chemical and enzymatic pathways leading to net NO production in the soil environment and are applied to a previous field study (Miller et al., 2018) to provide implications for tracing the sources of NO emission from agricultural soils.

## 135 2 Materials and methods

### 2.1 Soil characteristics and preparation

Soil samples used in this study were collected in July 2017 from a conventional corn-soybean rotation field in central Pennsylvania, USA, managed by the USDA (Agricultural Research Service, University Park, PA, USA). The soil is a well-drained Hagerstown silt loam (fine, mixed, semiactive, mesic Typic Hapludalfs) with sand, silt, and  
140 clay content of 21%, 58%, and 21%, respectively. The sampled surface layer (0 - 10 cm) had a bulk density of 1.2  $\text{g}\cdot\text{cm}^{-3}$  and a pH (1:1 water) of 5.7. Total N content was 0.2% and  $\delta^{15}\text{N}$  of total N was 5.3‰. Soil C:N ratio was 11.4 and organic carbon content was 1.8%. In the laboratory, soils were homogenized and sieved to 2 mm (but not air-dried) and then stored in resealable plastic bags at 4°C until further analyses and incubations. Gravimetric water content of the sieved and homogenized soils was 0.14  $\text{g H}_2\text{O}\cdot\text{g}^{-1}$ . Indigenous  $\text{NH}_4^+$  and  $\text{NO}_3^-$  concentrations were 0.7

145  $\mu\text{g N}\cdot\text{g}^{-1}$  and  $19.8 \mu\text{g N}\cdot\text{g}^{-1}$ , respectively. Throughout this paper, soil N concentrations, NO fluxes, and N transformation rates are expressed on the basis of soil oven-dry ( $105^\circ\text{C}$ ) weight.

## 2.2 Net NO production and collection of NO for $\delta^{15}\text{N}$ analysis

The recently developed soil dynamic flux chamber (DFC) system was used to measure net NO production rates and to collect soil-emitted NO for  $\delta^{15}\text{N}$  analysis (Yu and Elliott, 2017). A schematic of the DFC system is shown in Fig. 1a. Detailed development and validation procedures for the NO collection method were presented in Yu and Elliott (2017). Briefly, custom-made flow-through incubators modified from 1 L Pyrex medium bottles (13951L, Corning, USA) were used for all the incubation experiments (Fig. 1b). Each incubator was stoppered with two 42 mm Teflon septa secured by an open-topped screw cap and equipped with two vacuum valves for purging and closure of the incubator headspace. To measure net NO production from enclosed soil samples, a flow of NO-free air with desired O<sub>2</sub> content was directed through the incubator into a chemiluminescent NO-NO<sub>x</sub>-NH<sub>3</sub> analyzer (model 146i, Thermo Fisher Scientific) (Fig. 1a) (Yu and Elliott, 2017). Outflow NO concentration was monitored continuously until steady and then the net NO production rate was determined from the flow rate and steady-state NO concentration. To collect NO for  $\delta^{15}\text{N}$  analysis, a subsample of the incubator outflow was forced to pass through a NO collection train (Fig. 1a) where NO is converted to NO<sub>2</sub> by excess O<sub>3</sub> (~3 ppm) in a Teflon reaction tube (9.5 mm I.D., ca. 240 cm length) and subsequently collected in a 500 mL gas washing bottle containing a 20% (v/v, 70 mL) TEA solution (Yu and Elliott, 2017). The collection products were about 90% NO<sub>2</sub><sup>-</sup> and 10% NO<sub>3</sub><sup>-</sup> (Yu and Elliott, 2017). Results from comprehensive method testing showed that the NO collection efficiency was  $98.5\pm 3.5\%$  over a wide range of NO concentrations (12 to 749 ppb) and environmental conditions (e.g., temperature from 11 to  $31^\circ\text{C}$  and relative humidity of the incubator outflow from 27 to 92%) (Yu and Elliott, 2017). Moreover, it was confirmed that high concentrations of ammonia (NH<sub>3</sub>) (e.g., 500 ppb) and nitrous acid (HONO) (removed by an inline HONO scrubber (Fig. 1a)) in the incubator outflow do not interfere with NO collection (Yu and Elliott, 2017).

## 2.3 Anoxic incubation

To prepare for the anoxic incubation, the soil samples were spread out on a covered tray for pre-conditioning under room temperature ( $21^\circ\text{C}$ ) for 24 h. Next, the soil was amended with the Chilean NO<sub>3</sub><sup>-</sup> fertilizer ( $\delta^{15}\text{N}=0.3\pm 0.1\%$ ,  $\delta^{18}\text{O}=55.8\pm 0.1\%$ ,  $\Delta^{17}\text{O}=18.6\pm 0.1\%$ ) to achieve a fertilization rate of  $35 \mu\text{g NO}_3\text{-N}\cdot\text{g}^{-1}$  and a target soil water content of  $0.21 \text{ g H}_2\text{O}\cdot\text{g}^{-1}$  (equivalent to 46% water-filled pore space (WFPS)). The fertilized soil samples were thoroughly homogenized using a glass rod in the tray. 100 g (dry weight equivalent) soil was then weighed into each of eight incubators, resulting in a soil depth of about 1.5 cm. The incubators were connected in parallel using a Teflon purging manifold (Fig. 1c), vacuumed and filled with ultra-purity N<sub>2</sub> for three cycles, and incubated in dark with a continuous flow of N<sub>2</sub> circulating through each of the eight incubators at 0.015 standard liter per minute (SLPM). The sample fertilization and preparation procedures were repeated three times to establish three batches of replicate samples, leading to 24 soil samples in total for the anoxic incubation.

The first NO measurement and collection event was conducted 24 h after the onset of the anoxic incubation and daily sampling was conducted thereafter. At each sampling event, one incubator from each replicate sample



180 batch was isolated by closing the vacuum valves, removed from the purging manifold, and then measured using the DFC system. To prevent O<sub>2</sub> contamination by residual air in the DFC system, the DFC system was evacuated and flushed with N<sub>2</sub> five times before the vacuum valves were re-opened. A flow of N<sub>2</sub> was then supplied at 1 SLPM for continuous NO concentration measurement and collection. Samples from the replicate batches were measured successively.

185 Following the completion of measurement and collection of each sample, the incubator was opened from the top and the soil was combined with 500 mL deionized water for extraction of soil NO<sub>3</sub><sup>-</sup> and NO<sub>2</sub><sup>-</sup> (McKenney et al., 1982). Because NO<sub>2</sub><sup>-</sup> accumulation was found in pilot experiments, deionized water, rather than routinely used KCl solutions, was used for the extraction to ensure accurate NO<sub>2</sub><sup>-</sup> determination (Homyak et al., 2015). To extract soil NO<sub>3</sub><sup>-</sup> and NO<sub>2</sub><sup>-</sup>, the soil slurry was agitated vigorously on a stir plate for 10 minutes and then centrifuged for 10 minutes at ~~2000 rpm~~3400g. The resultant supernatant was filtered through a sterile 0.2 μm filter (Homyak et al., 190 2015). In light of high NO<sub>2</sub><sup>-</sup> concentrations observed in the pilot experiments, the filtrate was divided into two 60 mL Nalgene bottles, with one of the bottles receiving sulfamic acid to remove NO<sub>2</sub><sup>-</sup> (Granger et al., 2009). This NO<sub>2</sub><sup>-</sup>-removed sample was used for NO<sub>3</sub><sup>-</sup> isotope analysis, while the other sample without sulfamic acid treatment was used for determining NO<sub>2</sub><sup>-</sup> and NO<sub>3</sub><sup>-</sup> concentrations and combined δ<sup>15</sup>N analysis of NO<sub>2</sub><sup>-</sup>+NO<sub>3</sub><sup>-</sup>. Two important 195 control tests, based on NO<sub>2</sub><sup>-</sup>/NO<sub>3</sub><sup>-</sup> spiking and acetylene (C<sub>2</sub>H<sub>2</sub>) addition, were conducted to evaluate the robustness of the adopted soil incubation and extraction methods. The results confirmed that the water extraction method was robust for determining concentrations and isotopic composition of soil NO<sub>3</sub><sup>-</sup> and NO<sub>2</sub><sup>-</sup> and that aerobic NO<sub>3</sub><sup>-</sup> production from NH<sub>4</sub><sup>+</sup> oxidation was negligible during the soil incubation and extraction procedures (Table S1 and Table S2; see Text S2 in the Supplement for more details).

#### 200 2.4 Oxic and hypoxic incubations

The same pre-conditioning and fertilization protocol described for the anoxic incubation was used for the oxic and hypoxic incubations. Three isotopically different NH<sub>4</sub><sup>+</sup> fertilizers were used in parallel treatments of each incubation experiment: (1) δ<sup>15</sup>N-NH<sub>4</sub><sup>+</sup>=1.9‰ (low <sup>15</sup>N enrichment), (2) δ<sup>15</sup>N-NH<sub>4</sub><sup>+</sup>=22.5‰ (intermediate <sup>15</sup>N enrichment), and (3) δ<sup>15</sup>N-NH<sub>4</sub><sup>+</sup>=45.0‰ (high <sup>15</sup>N enrichment). An off-the-shelf ammonium sulfate ((NH<sub>4</sub>)<sub>2</sub>SO<sub>4</sub>) reagent was used in 205 the low δ<sup>15</sup>N-NH<sub>4</sub><sup>+</sup> treatment, while the fertilizers with intermediate and high enrichment of <sup>15</sup>N were prepared by gravimetrically mixing the (NH<sub>4</sub>)<sub>2</sub>SO<sub>4</sub> reagent with NH<sub>4</sub><sup>+</sup> reference materials IAEA-N2 (δ<sup>15</sup>N-NH<sub>4</sub><sup>+</sup>=20.3‰) and USGS26 (δ<sup>15</sup>N-NH<sub>4</sub><sup>+</sup>=53.7‰). In both oxic and hypoxic incubations, each of the three δ<sup>15</sup>N-NH<sub>4</sub><sup>+</sup> treatments consisted of three replicate sample batches where each batch consisted of eight samples, resulting in 72 samples for each incubation experiment.

210 At the onset of each incubation experiment, soil samples (100 g dry weight equivalent) were amended with desired NH<sub>4</sub><sup>+</sup> fertilizer (90 μg N·g<sup>-1</sup>) and the Chilean NO<sub>3</sub><sup>-</sup> fertilizer (15 μg N·g<sup>-1</sup>) to the target soil water content of 0.21 g H<sub>2</sub>O·g<sup>-1</sup> (46% WFPS). Following the amendment, two soil samples from each replicate batch were immediately extracted – one with 500 mL of deionized water for soil NO<sub>2</sub><sup>-</sup> and NO<sub>3</sub><sup>-</sup> using the extraction method described above and the other one with 500 mL of a 2 M KCl solution for determination of soil NH<sub>4</sub><sup>+</sup>. The 215 remaining samples were incubated under desired O<sub>2</sub> conditions until further measurements. In the oxic incubation,

Formatted: Font: Italic

the incubators were connected in parallel using the purging manifold and continuously flushed by a flow of zero air (20% O<sub>2</sub> + 80% N<sub>2</sub>). In the hypoxic incubation, a flow of synthetic air with 0.5% O<sub>2</sub> content (balanced by 99.5% N<sub>2</sub>) was used to incubate the soil samples. The synthetic air was generated by mixing the zero air with ultra-purity N<sub>2</sub> using two mass flow controllers (Model SmartTrak 50, Sierra Instruments).

220 Replicate NO measurement and collection events were conducted at 24 h, 48 h, and 72 h following the onset of the oxic and hypoxic incubations. Because net NO production rates were low under oxic and hypoxic conditions, all remaining soil samples in each replicate batch were connected in parallel for NO measurement and collection using the DFC system. This parallel connection ensured high outflow NO concentrations (i.e., >30 ppb) required for quantitative NO collection (Yu and Elliott, 2017). The flow rate of purging air (20% O<sub>2</sub> for the oxic incubation and 0.5% O<sub>2</sub> for the hypoxic incubation) during the DFC measurement was 0.25 SLPM to each incubator. Following the NO measurement and collection, two soil samples from each replicate batch were extracted for determination of soil NO<sub>3</sub><sup>-</sup>/NO<sub>2</sub><sup>-</sup> (500 mL deionized water) and NH<sub>4</sub><sup>+</sup> (500 mL 2M KCl), respectively. Because NO concentrations were too low for reliable NO collection at 72 h after the onset of the incubations, only net NO production rates were measured using the remaining two soil samples in each replicate batch.

## 230 2.5 Abiotic NO production

The potential for NO production from abiotic reactions was assessed using sterilized soil samples. Soil samples (100 g dry-weight equivalent) were weighed into the incubators and then autoclaved at 121°C and 1.3 atm for 30 minutes. The autoclaved samples were pre-incubated under oxic and anoxic conditions, respectively, for 24 h and then fertilized with the Chilean NO<sub>3</sub><sup>-</sup> (35 µg NO<sub>3</sub><sup>-</sup>-N·g<sup>-1</sup>) or the lab (NH<sub>4</sub>)<sub>2</sub>SO<sub>4</sub> (90 µg NH<sub>4</sub><sup>+</sup>-N·g<sup>-1</sup>). The fertilizer solutions were added to the soil surface through the Teflon septa using a sterile syringe equipped with a 25-gauge needle. These samples were then measured periodically for net NO production. Because NO<sub>2</sub><sup>-</sup> was found to accumulate during the anoxic incubation (see below), four soil samples were sterilized, pre-incubated under anoxic condition, and then fertilized with a NaNO<sub>2</sub> solution (δ<sup>15</sup>N-NO<sub>2</sub><sup>-</sup>=1.4±0.2‰) (8 µg N·g<sup>-1</sup>) for immediate NO measurement and collection. These NO<sub>2</sub><sup>-</sup>-amended samples were thereafter incubated under anoxic conditions and measured periodically for net NO production until undetectable.

## 240 2.6 Chemical and isotopic analyses

Soil NO<sub>3</sub><sup>-</sup> concentrations were determined using a Dionex Ion Chromatograph ICS-2000 with a precision of (1σ) of ±5.0 µg N·L<sup>-1</sup>. Soil NO<sub>2</sub><sup>-</sup> concentrations were analyzed using the Greiss-Islovay colorimetric reaction with a precision of ±1.2 µg N·L<sup>-1</sup>. Soil NH<sub>4</sub><sup>+</sup> concentrations were measured using a modified fluorometric OPA method for soil KCl extracts (Kang et al., 2003) with a precision of ±7.0 µg N·L<sup>-1</sup>. NO<sub>2</sub><sup>-</sup>+NO<sub>3</sub><sup>-</sup> concentration in the TEA collection samples was measured using a modified spongy cadmium method with a precision of ±1.6 µg N·L<sup>-1</sup> (Yu and Elliott, 2017).

The denitrifier method (Sigman et al., 2001; Casciotti et al., 2002) was used to measure δ<sup>15</sup>N and δ<sup>18</sup>O of NO<sub>3</sub><sup>-</sup> in the NO<sub>2</sub><sup>-</sup>-removed soil extracts and the δ<sup>15</sup>N of NO<sub>3</sub><sup>-</sup>+NO<sub>2</sub><sup>-</sup> in the extracts without sulfamic acid treatment. In brief, a denitrifying bacterium (*Pseudomonas aureofaciens*) lacking the N<sub>2</sub>O reductase enzyme was used to

convert 20 nmol of  $\text{NO}_3^-$  into gaseous  $\text{N}_2\text{O}$ . The  $\text{N}_2\text{O}$  was then purified in a series of chemical traps, cryo-focused, and finally analyzed on a GV Instruments Isoprime Continuous Flow Isotope Ratio Mass Spectrometer (CF-IRMS) at  $m/z$  44, 45, and 46 at the University of Pittsburgh *Regional Stable Isotope Laboratory for Earth and Environmental Science Research* where all isotope analyses were conducted for this study. International  $\text{NO}_3^-$  reference standards IAEA-N3, USGS34, and USGS35 were used to calibrate the  $\delta^{15}\text{N}$  and  $\delta^{18}\text{O}$  analyses. The long-term precision is  $\pm 0.3\%$  and  $\pm 0.5\%$ , respectively, for the  $\delta^{15}\text{N}$  and  $\delta^{18}\text{O}$  analyses. Because the denitrifier method does not differentiate  $\text{NO}_3^-$  and  $\text{NO}_2^-$  for the  $\delta^{15}\text{N}$  analysis,  $\delta^{15}\text{N}$  of  $\text{NO}_2^-$  was estimated using an isotopic mass balance when  $\text{NO}_2^-$  accounted for a significant fraction of the total  $\text{NO}_3^- + \text{NO}_2^-$  pool.

$\Delta^{17}\text{O}$  of  $\text{NO}_3^-$  was measured using the coupled bacterial reduction and thermal decomposition method described by Kaiser et al. (2007). The denitrifying bacteria were used to convert 200 nmol of  $\text{NO}_3^-$  to  $\text{N}_2\text{O}$ , which was subsequently converted to  $\text{O}_2$  and  $\text{N}_2$  by reduction over a gold surface at  $800^\circ\text{C}$ . The produced  $\text{O}_2$  and  $\text{N}_2$  were separated using a  $5\text{\AA}$  molecular sieve gas chromatograph, and the  $\text{O}_2$  was then analyzed for  $\delta^{17}\text{O}$  and  $\delta^{18}\text{O}$  using the CF-IRMS.  $\Delta^{17}\text{O}$  was calculated from the measured  $\delta^{17}\text{O}$  and  $\delta^{18}\text{O}$  using Equation (1) (see Text S1 in the Supplement) and calibrated by USGS34, USGS35, and a 1:1 mixture of USGS34 and USGS35.

$$\Delta^{17}\text{O} = \left[ \ln \left( \frac{\delta^{17}\text{O}}{1000} + 1 \right) - 0.52 \ln \left( \frac{\delta^{18}\text{O}}{1000} + 1 \right) \right] \times 1000 \quad \text{Equation (1)}$$

The precision of the  $\Delta^{17}\text{O}$  analysis of USGS35 and the USGS35:USGS34 mixture is  $\pm 0.3\%$  (Yu and Elliott, 2018). Following Kaiser et al. (2007), the measured  $\Delta^{17}\text{O}$ - $\text{NO}_3^-$  was used in the reduction of molecular isotope ratios of  $\text{N}_2\text{O}$  to correct for the isobaric interference (i.e.,  $m/z$  45) on the measured  $\delta^{15}\text{N}$ - $\text{NO}_3^-$ .

$\delta^{15}\text{N}$  of  $\text{NH}_4^+$  in the KCl extracts was measured by coupling the  $\text{NH}_3$  diffusion method (Zhang et al., 2015) and the hypobromite ( $\text{BrO}^-$ ) oxidation method (Zhang et al., 2007) with the denitrifier method (Felix et al., 2013). Briefly, an aliquot of soil KCl extract with 60 nmol  $\text{NH}_4^+$  was pipetted into a 20 mL serum vial containing an acidified glass fiber disk. The solution was made alkaline by adding magnesium oxide ( $\text{MgO}$ ) to volatilize  $\text{NH}_3$ , which was subsequently captured on the acidic disk as  $\text{NH}_4^+$ . After incubation under  $37^\circ\text{C}$  for 10 d,  $\text{NH}_4^+$  was eluted from the disk using deionized water, diluted to  $10\ \mu\text{M}$ , oxidized by  $\text{BrO}^-$  to  $\text{NO}_2^-$ , and finally measured for  $\delta^{15}\text{N}$  as  $\text{NO}_2^-$  at 20 nmol using the denitrifier method. International  $\text{NH}_4^+$  reference standards IAEA-N1, USGS25, and USGS26 underwent the same preparation procedure as the soil KCl extracts and were used along with the  $\text{NO}_3^-$  reference standards to correct for blanks and instrument drift. The precision of the  $\delta^{15}\text{N}$ - $\text{NH}_4^+$  analysis is  $\pm 0.5\%$  (Yu and Elliott, 2018).

$\delta^{15}\text{N}$  of  $\text{NO}$  collected in the TEA solution was measured following the method described in Yu and Elliott (2017). Briefly, the TEA collection samples were first neutralized with 12 N HCl to pH  $\sim 7$ , and then 10 to 20 nmol of the collected product  $\text{NO}_2^- + \text{NO}_3^-$  was converted to  $\text{N}_2\text{O}$  using the denitrifier method. In light of the low  $\delta^{15}\text{N}$  values of soil-emitted  $\text{NO}$  and the presence of  $\text{NO}_2^-$  as the dominant collection product, a low  $\delta^{15}\text{N}$   $\text{NO}_2^-$  isotopic standard ( $\text{KNO}_2$ , RSIL20, USGS Reston;  $\delta^{15}\text{N} = -79.6\%$ ) was used together with the international  $\text{NO}_3^-$  reference standards to calibrate the  $\delta^{15}\text{N}$ - $\text{NO}$  analysis. Following the identical treatment principle, we prepared the isotopic standards in the same matrix (i.e., 20% TEA) as the collection samples and matched both the molar N amount and injection volume ( $\pm 5\%$ ) between the collection samples and the standards to minimize the blank interferences associated with the bacterial medium and the TEA solution. The precision and accuracy of the  $\delta^{15}\text{N}$ - $\text{NO}$  analysis,

determined by repeated sampling of an analytical NO tank ( $\delta^{15}\text{N-NO} = -71.4\text{‰}$ ) under diverse collection conditions, is  $\pm 1.1\text{‰}$  (Yu and Elliott, 2017).

## 290 3 Results

Sixty-three NO collection samples were obtained from the incubation experiments. The NO collection efficiency calculated based on the measured  $\text{NO}_2^- + \text{NO}_3^-$  concentration in the TEA solution and the theoretical concentration based on the measured net NO production rate (Yu and Elliott, 2017) was on average  $99.1 \pm 3.7\%$ . Out of the sixty-three collection samples, four samples had a NO collection efficiency lower than 95%. These samples were  
295 excluded from further data analysis and interpretation. The measured N concentrations, net NO production rates, and isotope data from all the incubation experiments are available in Table S5 to Table S11 in the Supplement.

### 3.1 Anoxic incubation

During the anoxic incubation, soil  $\text{NO}_3^-$  concentration decreased linearly from  $49.3 \pm 0.1 \mu\text{g N}\cdot\text{g}^{-1}$  to  $23.1 \pm 0.2 \mu\text{g N}\cdot\text{g}^{-1}$  (Fig. 2a), while  $\text{NO}_2^-$  concentration increased linearly from  $0.4 \pm 0.1 \mu\text{g N}\cdot\text{g}^{-1}$  to  $6.9 \pm 0.1 \mu\text{g N}\cdot\text{g}^{-1}$  (Fig. 2b). The  
300 net NO production rate ( $f_{\text{NO-anoxic}}$ ) increased progressively from the first sampling day ( $72 \pm 8 \text{ ng N}\cdot\text{g}^{-1}\cdot\text{h}^{-1}$ ) to sampling day 5 and then stabilized at about  $82 \text{ ng N}\cdot\text{g}^{-1}\cdot\text{h}^{-1}$  (Fig. 2c).

$\delta^{15}\text{N-NO}_3^-$  and  $\delta^{15}\text{N-NO}$  values increased from  $4.7 \pm 0.3$  to  $38.7 \pm 1.5\text{‰}$  and  $-44.7 \pm 0.3$  to  $-22.8 \pm 2.2\text{‰}$ , respectively, over the anoxic incubation (Fig. 2d and 2f). The difference between  $\delta^{15}\text{N-NO}_3^-$  and  $\delta^{15}\text{N-NO}$  values increased significantly from 49.4 to 59.5‰ toward the end of the incubation (Fig. 2d and 2f). Based on the closed-  
305 system Rayleigh model, the apparent N isotopic fractionation during  $\text{NO}_3^-$  consumption was estimated to be  $43.3 \pm 0.9\text{‰}$  (Fig. S3 in the Supplement).  $\delta^{15}\text{N-NO}_2^-$  was estimated for samples collected in the last three sampling days where  $\text{NO}_2^-$  accounted for >15% of the  $\text{NO}_3^- + \text{NO}_2^-$  pool. The estimated  $\delta^{15}\text{N-NO}_2^-$  values were  $-6.9 \pm 3.7\text{‰}$ ,  $-6.0 \pm 2.5\text{‰}$ , and  $-0.9 \pm 1.3\text{‰}$ , respectively (Fig. 2e). Although limited to the last three sampling days,  $\delta^{15}\text{N-NO}_2^-$  was lower than  $\delta^{15}\text{N-NO}_3^-$  by 33.6 to 37.9‰ (Fig. 2d and 2e), but was higher than the concurrently measured  $\delta^{15}\text{N-NO}$   
310 values by a relatively constant offset of  $21.5 \pm 0.7\text{‰}$  (Fig. 2e and 2f). Surprisingly, both  $\delta^{18}\text{O-NO}_3^-$  values ( $33.4 \pm 0.2$  to  $23.1 \pm 0.3\text{‰}$ ) and  $\Delta^{17}\text{O-NO}_3^-$  values ( $10.0 \pm 0.2$  to  $0.7 \pm 0.2\text{‰}$ ) decreased progressively over the course of the anoxic incubation and were entirely decoupled from  $\delta^{15}\text{N-NO}_3^-$  (Fig. 2g and 2h).

### 3.2 Oxic and hypoxic incubations

Over the oxic incubation, soil  $\text{NH}_4^+$  concentration decreased linearly with increasing  $\text{NO}_3^-$  concentration under all  
315 three  $\delta^{15}\text{N-NH}_4^+$  treatments (Fig. 3a and 3b). In the hypoxic incubation, changes in  $\text{NH}_4^+$  and  $\text{NO}_3^-$  concentrations were more limited, although the linear trends were still evident (Fig. 3a and 3b). Under both oxic and hypoxic conditions, the total concentration of soil  $\text{NH}_4^+$  and  $\text{NO}_3^-$  remained nearly constant over the entire incubations (i.e., variations < 4%), and soil  $\text{NO}_2^-$  concentration was below the detection limit in both incubations. In the oxic incubation,  $\delta^{15}\text{N-NH}_4^+$  values uniformly increased by 8.6 to 13.1‰ under all three  $\delta^{15}\text{N-NH}_4^+$  treatments (Fig. 3e),  
320 while  $\delta^{15}\text{N-NO}_3^-$  values varied distinctly, depending on the initial  $\delta^{15}\text{N-NH}_4^+$  values (Fig. 3d). Specifically,  $\delta^{15}\text{N-NO}_3^-$  values increased by 7.8‰ and decreased by 10.9‰ under the high and low  $\delta^{15}\text{N-NH}_4^+$  treatments, respectively,

and remained relatively constant under the intermediate  $\delta^{15}\text{N-NH}_4^+$  treatment (Fig. 3d). Limited increases in  $\delta^{15}\text{N-NH}_4^+$  values (<2‰) were observed under all three  $\delta^{15}\text{N-NH}_4^+$  treatments in the hypoxic incubation (Fig. 3e). Correspondingly, variations in  $\delta^{15}\text{N-NO}_3^-$  values were much smaller in the hypoxic incubation compared to those revealed in the oxic incubation (Fig. 3d). In both oxic and hypoxic incubations,  $\delta^{18}\text{O-NO}_3^-$  (Fig. 3g) and  $\Delta^{17}\text{O-NO}_3^-$  (Fig. 3h) values decreased progressively under all three  $\delta^{15}\text{N-NH}_4^+$  treatments, although the rates of decrease were significantly higher in the oxic incubation (Fig. 3g and 3h).

The net NO production was significantly higher in the hypoxic incubation ( $f_{\text{NO-hypoxic}}$ ; 9.0 to 10.4 ng N·g<sup>-1</sup>·h<sup>-1</sup>) than in the oxic incubation ( $f_{\text{NO-oxic}}$ ; 7.1 to 8.5 ng N·g<sup>-1</sup>·h<sup>-1</sup>) (Fig. 3c). The measured  $\delta^{15}\text{N-NO}$  values ranged from -16.8±0.3 to -54.9±0.8‰ in the oxic incubation and from -21.3±0.0 to -51.4±0.4‰ in the hypoxic incubation (Fig. 3f). Pooling all the  $\delta^{15}\text{N-NO}$  measurements, we found that  $\delta^{15}\text{N}$  values between  $\text{NH}_4^+$  and NO differed from 58.9 to 70.7‰ across the three  $\delta^{15}\text{N-NH}_4^+$  treatments in the oxic incubation and from 50.4 to 69.6‰ in the hypoxic incubation (Fig. 4). In both incubations, the largest difference was observed under the high  $\delta^{15}\text{N-NH}_4^+$  treatment, while the smallest difference was observed under the low  $\delta^{15}\text{N-NH}_4^+$  treatment. Under both oxic and hypoxic conditions, there was a significant linear relationship between the measured  $\delta^{15}\text{N-NO}$  and  $\delta^{15}\text{N-NH}_4^+$  values from all three  $\delta^{15}\text{N-NH}_4^+$  treatments (Fig. 4). The slope of the linear relationship is 0.78±0.03 (± 1 SE) and 0.61±0.05 for the oxic and hypoxic incubations, respectively (Fig. 4).

### 3.3 Abiotic NO production

Addition of  $\text{NO}_3^-$  or  $\text{NH}_4^+$  to the sterilized soil did not result in detectable NO production under either oxic or anoxic condition. Immediate NO release was, however, triggered by  $\text{NO}_2^-$  addition under anoxic conditions (Fig. 5a). The abiotic NO production rate ( $f_{\text{NO-abiotic}}$ ) reached a steady level of 83±5 ng N·g<sup>-1</sup>·h<sup>-1</sup> several minutes after the  $\text{NO}_2^-$  addition and then decreased exponentially to < 3 ng N·g<sup>-1</sup>·h<sup>-1</sup> over the following 8 days (Fig. 5a). The natural logarithm of  $f_{\text{NO-abiotic}}$  showed a linear relationship with time (Fig. 5b). The NO produced following the  $\text{NO}_2^-$  addition had a  $\delta^{15}\text{N}$  value of -17.8±0.4‰, giving rise to a  $\delta^{15}\text{N}$  offset between  $\text{NO}_2^-$  and NO of 19.2±0.5‰.

## 4 Discussion

Because interpretations of the results from the incubation experiments build upon each other, here we discuss the results from incubation of the sterilized soils (hereafter, abiotic incubation), anoxic incubation, and oxic/hypoxic incubations successively.

### 4.1 Reaction characteristics and N isotopic fractionation during abiotic NO production

The immediate release of NO upon the addition of  $\text{NO}_2^-$  highlights the chemically unstable nature of  $\text{NO}_2^-$  and the critical role of chemical  $\text{NO}_2^-$  reactions in driving soil NO emissions (Venterea et al., 2005; Lim et al., 2018). The strong linearity between  $\ln(f_{\text{NO-abiotic}})$  and time (Fig. 5b) suggests apparent first-order kinetics for the abiotic NO production from  $\text{NO}_2^-$  (Equations 2 and 3) (McKenney et al., 1990).

$$f_{\text{NO-abiotic}} = s_{\text{abiotic}} \times k_{\text{abiotic}} \times [\text{NO}_2^-]_t \quad \text{Equation (2)}$$

$$[\text{NO}_2^-]_t = [\text{NO}_2^-]_0 e^{-k_{\text{abiotic}} \times t} \quad \text{Equation (3)}$$

In Equations 2 and 3,  $t$  is time;  $k_{\text{abiotic}}$  is the pseudo-first order rate constant for  $\text{NO}_2^-$  loss;  $s_{\text{abiotic}}$  is the apparent stoichiometric coefficient for NO production from  $\text{NO}_2^-$ ; and  $[\text{NO}_2^-]_t$  and  $[\text{NO}_2^-]_0$  are  $\text{NO}_2^-$  concentration at time  $t$  and  $t=0$  in the sterilized soil, respectively. Combining Equations 2 and 3 and then log-transforming both sides yield:

$$\ln(f_{\text{NO-abiotic}}) = -k_{\text{abiotic}} \times t + \ln(s_{\text{abiotic}} \times k_{\text{abiotic}} \times [\text{NO}_2^-]_0) \quad \text{Equation (4)}$$

360 According to Equation 4,  $k_{\text{abiotic}}$  and  $s_{\text{abiotic}}$  are estimated using the slope and intercept of the linear regression of  $\ln(f_{\text{NO-abiotic}})$  versus time (Fig. 5b). Given  $[\text{NO}_2^-]_0 = 8 \mu\text{g N}\cdot\text{g}^{-1}$ ,  $s_{\text{abiotic}}$  and  $k_{\text{abiotic}}$  are estimated to be  $0.52 \pm 0.05$  ( $\pm\text{SE}$ ) and  $0.019 \pm 0.002 \text{ h}^{-1}$ , respectively, suggesting that NO accounted for  $52 \pm 5\%$  of the reacted  $\text{NO}_2^-$  during the abiotic incubation. The estimated  $k_{\text{abiotic}}$  is within the range (i.e.,  $0.00055$  to  $0.73 \text{ h}^{-1}$ ) derived by a recent study based on soil samples spanning a wide range of pH values (3.4 to 7.2) (Lim et al., 2018). Based on the estimated  $k_{\text{abiotic}}$ , 97% of  
365 the added  $\text{NO}_2^-$  was lost by the end of the abiotic incubation.

Several reaction pathways with distinct stoichiometry have been proposed for abiotic NO production from  $\text{NO}_2^-$  in soils. Under acidic soil conditions, self-decomposition of  $\text{HNO}_2$  produces NO and nitric acid ( $\text{HNO}_3$ ) with a stoichiometric  $\text{HNO}_2$ -to-NO ratio ranging from 0.5 to 0.66 (i.e., 1 mole of  $\text{HNO}_2$  produces 0.5 to 0.66 mole of NO) (Van Cleemput and Samater, 1995). Although at pH 5.7,  $\text{HNO}_2$  constituted  $<1\%$  of the  $\text{NO}_2^- + \text{HNO}_2$  pool in this soil,  
370  $\text{HNO}_2$  decomposition can occur on acidic clay mineral surfaces, even though bulk soil pH is circumneutral (Venterea et al., 2005). However, given the complete  $\text{NO}_2^-$  consumption in the abiotic incubation,  $\text{HNO}_2$  decomposition confined to acidic microsites could not account for all observed NO production. Under anoxic conditions,  $\text{NO}_2^-/\text{HNO}_2$  can also be stoichiometrically reduced to NO by transition metals (e.g., Fe(II)) and diverse organic molecules (e.g., humic and fulvic acids, lignins, and phenols) in a process termed chemo-denitrification (Zhu-Baiker et al., 2015). The produced NO from chemo-denitrification can undergo further reduction to form  $\text{N}_2\text{O}$  and  $\text{N}_2$  (Zhu-Baiker et al., 2015). In addition, both  $\text{NO}_2^-$  and NO in soil solution can be consumed as nitroso donors in abiotic nitrosation reactions, resulting in N incorporation into soil organic matter (Heil et al., 2016; Lim et al., 2018). Therefore, our observation that about half of the reacted  $\text{NO}_2^-$  was recovered as NO may result from multiple competing  $\text{NO}_2^-$  sinks, parallel NO-producing pathways, and possibly abiotic NO consumption in the sterilized soil.  
380 The other half of the reacted  $\text{NO}_2^-$  that could not be accounted for by the measured NO was likely present in the forms of  $\text{N}_2\text{O}$ ,  $\text{N}_2$ , and/or nitrosated organic compounds in the soil.

The observed  $\delta^{15}\text{N}$  difference between  $\text{NO}_2^-$  and NO (i.e.,  $^{15}\eta_{\text{NO}_2/\text{NO}(\text{abiotic})} = 19.2 \pm 0.5\%$ ) likely reflects a combined N isotope effect for all of the competing NO production pathways during the abiotic incubation. While very little isotope data exist for abiotic  $\text{NO}_2^-$  reactions in the literature, the measured  $^{15}\eta_{\text{NO}_2/\text{NO}(\text{abiotic})}$  in this study is  
385 consistent with reported N isotope effects (i.e., 15 to 25‰) for abiotic  $\text{NO}_2^-$  reduction by Fe(II) at similar  $\text{NO}_2^-$  consumption rates as this study ( $0.02$  to  $0.05 \text{ h}^{-1}$ ) (Buchwald et al., 2016). On the other hand, the measured  $^{15}\eta_{\text{NO}_2/\text{NO}(\text{abiotic})}$  is lower than the reported  $\delta^{15}\text{N}$  offsets between  $\text{NO}_2^-$  and  $\text{N}_2\text{O}$  (i.e.,  $^{15}\eta_{\text{NO}_2/\text{N}_2\text{O}(\text{abiotic})}$ ) for chemo-denitrification (24 to 29‰) (Jones et al., 2015; Wei et al., 2019). This seems to suggest that the observed abiotic NO production was mainly driven by chemo-denitrification and that accumulation of NO as an chemo-denitrification intermediate may explain why the observed  $^{15}\eta_{\text{NO}_2/\text{N}_2\text{O}(\text{abiotic})}$  was larger than the N isotope effect for Fe(II)-catalyzed  
390  $\text{NO}_2^-$  reduction in previous batch experiments (Jones et al., 2015; Buchwald et al., 2016). Future studies adopting

simultaneous  $\delta^{15}\text{N-NO}$  and  $\delta^{15}\text{N-N}_2\text{O}$  measurements will be required to elucidate the role of NO as the  $\text{N}_2\text{O}$  precursor during chemo-denitrification.

It is important to note that the autoclaving is a harsh sterilization method and can substantially alter soil physical and chemical properties. For example, Buessecker et al. (2019) recently showed that autoclaved peat soil had 10-fold higher total fluorescence compared to non-sterilized controls, indicating dramatic increases in solubility and lability of organic molecules by autoclaving. Furthermore, autoclaving has also been shown to substantially increase abiotic  $\text{N}_2\text{O}$  production from  $\text{NO}_2^-$ -amended soils (Wei et al., 2019). Conversely, milder sterilization methods (e.g., gamma-irradiation) that presumably cause less alteration of soil properties may not completely inactivate biological NO production due to the high diversity of biological NO production pathways in soils (e.g., non-specific reactions catalyzed by extracellular enzymes) (Medinets et al., 2015). Further research is warranted to compare different sterilization methods for their effects on abiotic NO production and  $^{15}\eta_{\text{NO}_2/\text{NO}(\text{abiotic})}$ .

#### 4.2 Reaction reversibility between $\text{NO}_3^-$ and $\text{NO}_2^-$ and N isotope distribution between $\text{NO}_3^-$ , $\text{NO}_2^-$ , and NO during the anoxic incubation

The measured  $f_{\text{NO-anoxic}}$  (72 to 82  $\text{ng N}\cdot\text{g}^{-1}\cdot\text{h}^{-1}$ ) (Fig. 2c) is well within the range reported for anoxic soil incubations (e.g., 5 to 500  $\text{ng N}\cdot\text{g}^{-1}\cdot\text{h}^{-1}$ ) (Medinets et al., 2015), and is about 2/3 of the net consumption rate of  $\text{NO}_3^- + \text{NO}_2^-$  during the anoxic incubation. That the majority of consumed  $\text{NO}_3^- + \text{NO}_2^-$  was recovered as NO supports the emerging notion that NO can be the end product of denitrification once limitations on gas diffusion are lifted in soils (Russow et al., 2009; Loick et al., 2016). Applying the derived  $k_{\text{abiotic}}$  and  $s_{\text{abiotic}}$  in the abiotic incubation to the measured  $\text{NO}_2^-$  concentrations under anoxic condition produced a range of  $f_{\text{NO-abiotic}}$  from < 4 to 68  $\text{ng N}\cdot\text{g}^{-1}\cdot\text{h}^{-1}$  (Fig. S4 in the Supplement). While this modeled  $f_{\text{NO-abiotic}}$  appears to contribute up to 80% of the measured  $f_{\text{NO-anoxic}}$  (Fig. S4 in the Supplement),  $f_{\text{NO-anoxic}}$  was high and remained stable even without any significant accumulation of  $\text{NO}_2^-$  in the soil (Fig. 2b and 2c), suggesting that  $k_{\text{abiotic}}$  was likely overestimated in the abiotic incubation (see above). Assuming that net biological NO production was maintained at the level of  $f_{\text{NO-anoxic}}$  measured during the first sampling event and that  $s_{\text{abiotic}}$  was constant and equal to 0.52, a back-of-the-envelope calculation based on the difference in  $f_{\text{NO-anoxic}}$  between the first and last sampling events and the  $\text{NO}_2^-$  concentration measured at the end of the anoxic incubation indicates that  $k_{\text{abiotic}}$  was likely on the order of  $0.0027 \text{ h}^{-1}$ , or about 7 times lower than the  $k_{\text{abiotic}}$  derived in the abiotic incubation. Although qualitative, this calculation suggests a minor contribution of abiotic NO production to the measured  $f_{\text{NO-anoxic}}$  (<12%; Fig. S4 in the Supplement).

The large increases in  $\delta^{15}\text{N-NO}_3^-$  and  $\delta^{15}\text{N-NO}$  values over the anoxic incubation (Fig. 2d and 2f) are congruent with strong N isotopic fractionations during microbial denitrification (Mariotti et al., 1981; Granger et al., 2008). However, the observed net isotope effect for NO production from  $\text{NO}_3^-$  (i.e.,  $^{15}\eta_{\text{NO}_3/\text{NO}}$ ; 49.4 to 59.5‰) is larger than the apparent N isotope effect for  $\text{NO}_3^-$  consumption ( $43.3 \pm 0.9\%$ ) (Fig. S3 in the Supplement). The large magnitude and increasing pattern of  $^{15}\eta_{\text{NO}_3/\text{NO}}$ , together with the accumulation of  $\text{NO}_2^-$  in the soil, point to complexity beyond single-step isotopic fractionations and highlight the need to carefully examine fractionation mechanisms for all intermediate steps leading to net NO production (i.e.,  $\text{NO}_3^-$  to  $\text{NO}_2^-$ ,  $\text{NO}_2^-$  to NO, and NO to  $\text{N}_2\text{O}$ ). Moreover, it is surprising that both  $\delta^{18}\text{O-NO}_3^-$  and  $\Delta^{17}\text{O-NO}_3^-$  values decreased over the anoxic incubation (Fig. 2g and 2h). Interestingly, similar decreasing trends in  $\delta^{18}\text{O-NO}_3^-$  values (e.g., up to 4‰ over 25 h) have been

430 reported by Lewicka-Szczebak et al. (2014) for two anoxically incubated agricultural soils amended with a high-  
 $\delta^{18}\text{O}$  Chilean  $\text{NO}_3^-$  fertilizer similar to ours (i.e.,  $\delta^{18}\text{O}\text{-NO}_3^- = 56\text{‰}$ ), although  $\Delta^{17}\text{O}\text{-NO}_3^-$  was not reported in this  
previous study. The decreasing  $\delta^{18}\text{O}\text{-NO}_3^-$  values, observed here and by Lewicka-Szczebak et al. (2014), appear to  
contradict the well-established paradigm that variations in  $\delta^{15}\text{N}\text{-NO}_3^-$  and  $\delta^{18}\text{O}\text{-NO}_3^-$  values follow a linear trajectory  
with a slope of 0.5 to 1 during dissimilatory  $\text{NO}_3^-$  reduction (Granger et al., 2008). Furthermore, as  $\Delta^{17}\text{O}\text{-NO}_3^-$  is in  
theory not altered by microbial denitrification – a mass-dependent fractionation process (Michalski et al., 2004; Yu  
and Elliott, 2018), the decreasing  $\Delta^{17}\text{O}\text{-NO}_3^-$  values observed in this study indicate that processes capable of diluting  
or erasing the  $\Delta^{17}\text{O}$  signal may occur concurrently with denitrification during the anoxic incubation. Importantly, if  
this dilution or removal of the  $\Delta^{17}\text{O}$  signal was accompanied by N isotopic fractionations, there may be cascading  
effects on the distribution of N isotopes between  $\text{NO}_3^-$ ,  $\text{NO}_2^-$ , and  $\text{NO}$ .

440 The decreasing  $\delta^{18}\text{O}\text{-NO}_3^-$  and  $\Delta^{17}\text{O}\text{-NO}_3^-$  values could be potentially explained by an O isotope  
equilibration between  $\text{NO}_3^-$  and soil  $\text{H}_2\text{O}$ , catalyzed either chemically or biologically via a reversible reaction  
between  $\text{NO}_3^-$  and  $\text{NO}_2^-$  (Granger and Wankel, 2016). However, it has been shown in controlled laboratory  
experiments that dissimilatory  $\text{NO}_3^-$  reduction catalyzed by bacterial nitrate reductase (NAR) is irreversible at the  
enzyme level (Treiber and Granger, 2017) and that abiotic O isotope exchange between  $\text{NO}_3^-$  and  $\text{H}_2\text{O}$  is  
extremely slow (half-life  $>10^9$  y at 25°C and pH 7) and therefore irrelevant under natural soil conditions (Kaneko  
and Poulson, 2013). Although fungi use a distinct enzyme system for denitrification (Shoun et al., 2012), there is no  
evidence for enzymatic reversibility of fungal NAR in the literature. Furthermore, by converting  $\text{NH}_4^+$  and  $\text{NO}_2^-$   
simultaneously to  $\text{N}_2$  and  $\text{NO}_3^-$ , anaerobic  $\text{NH}_4^+$  oxidation (anammox) could dilute the  $\Delta^{17}\text{O}$  signal by producing  
 $\text{NO}_3^-$  with  $\Delta^{17}\text{O}=0$  (Brunner et al., 2013). However, due to the low indigenous  $\text{NH}_4^+$  concentration, anammox is  
considered not pertinent during the anoxic incubation. Given the complete recovery of  $\text{NO}_3^-$  concentrations and  
isotopes in the control experiments (Table S1 and Table S2 in the Supplement), as well as the significantly increased  
450  $\delta^{15}\text{N}\text{-NO}_3^-$  values during the anoxic incubation, we excluded  $\text{NO}_3^-$  production from aerobic  $\text{NH}_4^+$  oxidation as a  
possible explanation for the observed declines in  $\delta^{18}\text{O}\text{-NO}_3^-$  and  $\Delta^{17}\text{O}\text{-NO}_3^-$  values.

Therefore, having ruled out the above possibilities led us to postulate that the decreasing  $\delta^{18}\text{O}\text{-NO}_3^-$  and  
 $\Delta^{17}\text{O}\text{-NO}_3^-$  values may result from anaerobic  $\text{NO}_2^-$  oxidation mediated by NOB in the soil. The enzyme catalyzing  
455  $\text{NO}_2^-$  oxidation to  $\text{NO}_3^-$  in NOB –  $\text{NO}_2^-$  oxidoreductase (NXR) – is metabolically versatile and has been shown to  
catalyze  $\text{NO}_3^-$  reduction under anoxic conditions by operating in reverse (Friedman et al., 1986; Freitag et al., 1987;  
Bock et al., 1988; Koch et al., 2015). Moreover, during NXR-catalyzed  $\text{NO}_2^-$  oxidation, the required O atom  
originates from  $\text{H}_2\text{O}$  molecules (Reaction 1), so that  $\text{NO}_2^-$  can in theory be oxidized to  $\text{NO}_3^-$  without the presence of  
 $\text{O}_2$  by donating electrons to redox-active intracellular components (Wunderlich et al., 2013) or alternative electron  
460 acceptors in niche environments (Babbin et al., 2017).

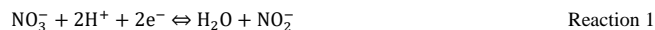

In a denitrifying environment, anaerobic oxidation of denitrification-produced  $\text{NO}_2^-$  back to  $\text{NO}_3^-$  (i.e.,  $\text{NO}_2^-$  re-  
oxidation) can dilute  $\delta^{18}\text{O}\text{-NO}_3^-$  and  $\Delta^{17}\text{O}\text{-NO}_3^-$  values by incorporating a 'new' O atom from  $\text{H}_2\text{O}$  into the reacting  
 $\text{NO}_3^-$  pool (Reaction 1) (Granger and Wankel, 2016). Under acidic and circumneutral pH conditions, this dilution  
465 effect can be further enhanced by chemically- and perhaps biologically-catalyzed O isotope equilibration between



NO<sub>2</sub><sup>-</sup> and H<sub>2</sub>O (Casciotti et al., 2007; Buchwald and Casciotti, 2010), which effectively erase the isotopic imprints of denitrification on NO<sub>2</sub><sup>-</sup> prior to its re-oxidation. The reversibility of NXR and its direct control on O isotopes in NO<sub>3</sub><sup>-</sup> have been convincingly demonstrated by Wunderlich et al. (2013) using a pure culture of *Nitrobacter vulgaris*. By incubating *N. vulgaris* in a NO<sub>3</sub><sup>-</sup> solution under anoxic conditions, Wunderlich et al. (2013) showed that NO<sub>2</sub><sup>-</sup> was produced in the solution by *N. vulgaris* and that *N. vulgaris* promoted incorporation of amended <sup>18</sup>O-H<sub>2</sub>O labels into NO<sub>3</sub><sup>-</sup> through a re-oxidation of the accumulated NO<sub>2</sub><sup>-</sup> (Wunderlich et al., 2013).

Importantly, there is mounting evidence from the marine N cycle community that NO<sub>2</sub><sup>-</sup> re-oxidation plays a critical role in the N isotope partitioning between NO<sub>3</sub><sup>-</sup> and NO<sub>2</sub><sup>-</sup>. At the process scale, NO<sub>2</sub><sup>-</sup> re-oxidation co-occurring with dissimilatory NO<sub>3</sub><sup>-</sup> reduction can lead to a large δ<sup>15</sup>N difference between NO<sub>3</sub><sup>-</sup> and NO<sub>2</sub><sup>-</sup> beyond what would be expected to result from NO<sub>3</sub><sup>-</sup> reduction alone (Gaye et al., 2013; Dale et al., 2014; Dähnke and Thamdrup, 2015; Peters et al., 2016; Martin and Casciotti, 2017; Buchwald et al., 2018). This large δ<sup>15</sup>N difference is thought to arise from a rare, but intrinsic, inverse kinetic isotope effect associated with NO<sub>2</sub><sup>-</sup> re-oxidation (e.g., -13‰) (Casciotti et al., 2009). As such, in a net denitrifying environment, NO<sub>2</sub><sup>-</sup> re-oxidation functions as an apparent branching pathway along the sequential reduction of NO<sub>3</sub><sup>-</sup>, preferentially re-oxidizing <sup>15</sup>NO<sub>2</sub><sup>-</sup> back to NO<sub>3</sub><sup>-</sup>. At the enzyme scale, the bidirectional NXR enzyme has been proposed to catalyze intracellular coupled NO<sub>3</sub><sup>-</sup> reduction and NO<sub>2</sub><sup>-</sup> oxidation (i.e., bidirectional interconversion of NO<sub>3</sub><sup>-</sup> and NO<sub>2</sub><sup>-</sup>), facilitating expression of an equilibrium N isotope effect between NO<sub>3</sub><sup>-</sup> and NO<sub>2</sub><sup>-</sup> (Reaction 2) (Wunderlich et al., 2013; Kemeny et al., 2016).

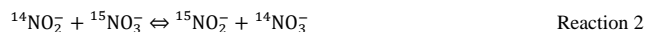

Evidence from pure culture studies of anammox bacteria carrying the NXR enzyme (Brunner et al., 2013) and theoretical quantum calculations (Casciotti, 2009) suggests that this N isotope equilibration favors partitioning of <sup>14</sup>N into NO<sub>2</sub><sup>-</sup> with an equilibrium isotope effect ranging from -50 to -60‰ (negative sign is used to denote that this N isotope equilibration partitions <sup>14</sup>N to the left side of Reaction 2). This NXR-catalyzed NO<sub>3</sub><sup>-</sup>/NO<sub>2</sub><sup>-</sup> interconversion was invoked to explain the extremely low δ<sup>15</sup>N-NO<sub>2</sub><sup>-</sup> values relative to δ<sup>15</sup>N-NO<sub>3</sub><sup>-</sup> (up to 90‰) in the surface Antarctic ocean, where aerobic NO<sub>2</sub><sup>-</sup> oxidation is inhibited by low nutrient availability (Kemeny et al., 2016). Hypothetically, if expressed at either the process or the enzyme level, the N isotope effect for NO<sub>2</sub><sup>-</sup> re-oxidation could propagate into denitrification-produced NO, giving rise to an increased δ<sup>15</sup>N difference between NO<sub>3</sub><sup>-</sup> and NO (<sup>15</sup>η<sub>NO<sub>3</sub>/NO</sub>).

To test whether NO<sub>2</sub><sup>-</sup> re-oxidation can explain the observed declines in δ<sup>18</sup>O-NO<sub>3</sub><sup>-</sup> and Δ<sup>17</sup>O-NO<sub>3</sub><sup>-</sup> values and δ<sup>15</sup>N distribution between NO<sub>3</sub><sup>-</sup>, NO<sub>2</sub><sup>-</sup>, and NO, we modified an isotopologue-specific (i.e., <sup>14</sup>N, <sup>15</sup>N, <sup>16</sup>O, <sup>17</sup>O, and <sup>18</sup>O) numerical model previously described by Yu and Elliott (2018) to simulate co-occurring denitrification and NO<sub>2</sub><sup>-</sup> re-oxidation in two steps. Without a clear identification of the alternative electron acceptors that coupled with anaerobic NO<sub>2</sub><sup>-</sup> oxidation in the studied soil, we followed the reaction scheme proposed by Wunderlich et al. (2013) and Kemeny et al. (2016) (Reaction 1) to parameterize the NXR-catalyzed NO<sub>2</sub><sup>-</sup> re-oxidation as the backward reaction of a dynamic equilibrium between NO<sub>3</sub><sup>-</sup> and NO<sub>2</sub><sup>-</sup> (Fig. 6) – that is, the NXR-catalyzed NO<sub>2</sub><sup>-</sup> re-oxidation (backward reaction) is balanced by an NXR-catalyzed NO<sub>3</sub><sup>-</sup> reduction (forward reaction), leading to no net NO<sub>2</sub><sup>-</sup> oxidation or NO<sub>3</sub><sup>-</sup> reduction in the soil. Importantly, this representation is consistent with the observation that both NO<sub>3</sub><sup>-</sup> consumption and NO<sub>2</sub><sup>-</sup> accumulation followed a pseudo-zero order kinetics over the anoxic incubation (Fig. 2a

and 2b), which implies no net contribution from the  $\text{NO}_3^-/\text{NO}_2^-$  interconversion. Given previous findings that the NXR-catalyzed O exchange between  $\text{NO}_3^-$  and  $\text{NO}_2^-$  depends on  $\text{NO}_2^-$  availability (Wunderlich et al., 2013), the backward  $\text{NO}_2^-$  re-oxidation was assumed to be first order (with respect to  $\text{NO}_2^-$ ), defined by a first order rate constant,  $k_{\text{NXR}(b)}$ . With respect to the O isotope equilibration between  $\text{H}_2\text{O}$  and the reacting  $\text{NO}_2^-$  pool, we considered two extreme case scenarios: (1) no exchange and (2) complete exchange. In the “no exchange” scenario, the imprints of denitrification on  $\delta^{18}\text{O}\text{-NO}_2^-$  and  $\Delta^{17}\text{O}\text{-NO}_2^-$  values are preserved, such that only one  $\text{H}_2\text{O}$ -derived O atom is incorporated into  $\text{NO}_3^-$  with each  $\text{NO}_2^-$  molecule being re-oxidized (Reaction 1). In the “complete exchange” scenario,  $\delta^{18}\text{O}$  and  $\Delta^{17}\text{O}$  values of  $\text{NO}_2^-$  always reflect those of soil  $\text{H}_2\text{O}$  ( $\delta^{18}\text{O}\text{-H}_2\text{O}\approx 10\text{‰}$ ,  $\Delta^{17}\text{O}\text{-H}_2\text{O}=0\text{‰}$ ) (Fig. 6), and therefore all three O atoms in  $\text{NO}_3^-$  produced from  $\text{NO}_2^-$  re-oxidation originate from  $\text{H}_2\text{O}$ . Furthermore, we considered both abiotic NO production and denitrification as the source of NO during the anoxic incubation (Fig. 6). To account for the potential overestimation in  $k_{\text{abiotic}}$  (see above), we used a reduced  $k_{\text{abiotic}}$  ( $0.0027\text{ h}^{-1}$ ) to model net abiotic NO production from  $\text{NO}_2^-$ , while  $s_{\text{abiotic}}$  and  $^{15}\eta_{\text{NO}_2/\text{NO}(\text{abiotic})}$  were fixed at 0.52 and 19.2‰, respectively. With respect to  $\delta^{15}\text{N}$  of denitrification-produced NO, we assumed that NIR-catalyzed  $\text{NO}_2^-$  reduction to NO and NOR-catalyzed NO reduction to  $\text{N}_2\text{O}$  were each associated with a kinetic N isotope effect ( $^{15}\eta_{\text{NIR}}$  and  $^{15}\eta_{\text{NOR}}$ ). The closed-system Rayleigh equation was then used to simulate the coupled NO production and reduction in denitrification at each model time interval (Lewicka-Szczekab et al. 2014). Detailed model derivation and formulation are provided in the Supplement (Text S3.1).

With this model of co-occurring denitrification and  $\text{NO}_2^-$  re-oxidation, we first solved for the rates of denitrifier-catalyzed  $\text{NO}_3^-$  ( $R_{\text{NAR}}$ ),  $\text{NO}_2^-$  ( $R_{\text{NIR}}$ ), and NO ( $R_{\text{NOR}}$ ) reductions and  $k_{\text{NXR}(b)}$  (4 unknowns) using the measured  $\text{NO}_3^-$  and  $\text{NO}_2^-$  concentrations,  $f_{\text{NO-anoxic}}$ , and  $\Delta^{17}\text{O}\text{-NO}_3^-$  values (4 measured variables). This first modeling step was robustly constrained by the measured  $\Delta^{17}\text{O}\text{-NO}_3^-$ , which essentially functions as a  $^{15}\text{NO}_3^-$  tracer (Yu and Elliott, 2018) and is therefore particularly sensitive to  $\text{NO}_2^-$  re-oxidation. In the second modeling step, the measured  $\delta^{15}\text{N}\text{-NO}_3^-$ ,  $\delta^{15}\text{N}\text{-NO}_2^-$ , and  $\delta^{15}\text{N}\text{-NO}$  values (3 measured variables) were used to optimize the kinetic N isotope effects for NAR-catalyzed  $\text{NO}_3^-$  reduction ( $^{15}\eta_{\text{NAR}}$ ),  $^{15}\eta_{\text{NIR}}$ ,  $^{15}\eta_{\text{NOR}}$ , and the equilibrium N isotope effect for NXR-catalyzed  $\text{NO}_3^-/\text{NO}_2^-$  interconversion ( $^{15}\eta_{\text{NXR}(\text{eq})}$ ) (Reaction 2; Fig. 6) (4 unknowns). This modeling system is under-determined (number of measured variables < number of unknowns) and thus cannot be solved uniquely. Thus, instead of definitively solving for the four unknown isotope effects, we explored their best combination to fit the measured  $\delta^{15}\text{N}$  values of  $\text{NO}_3^-$ ,  $\text{NO}_2^-$ , and NO. Specifically, to reduce the number of unknowns for model optimization,  $^{15}\eta_{\text{NAR}}$  and  $^{15}\eta_{\text{NXR}(\text{eq})}$  were treated as known values, and  $^{15}\eta_{\text{NIR}}$  and  $^{15}\eta_{\text{NOR}}$  were solved by mapping through the entire space of  $^{15}\eta_{\text{NAR}}$  and  $^{15}\eta_{\text{NXR}(\text{eq})}$  (at a resolution of 1‰), defined by their respective widest range of possible values. We used a range of 5 to 55‰ for  $^{15}\eta_{\text{NAR}}$ , consistent with a recent compilation based on soil incubations and denitrifier pure cultures (Denk et al., 2017). Given the existing observational and theoretical constraints (Casciotti, 2009; Brunner et al., 2013), a range of -60 to 0‰ was assigned to  $^{15}\eta_{\text{NXR}(\text{eq})}$ , which is equivalent to the argument that the impact of  $\text{NO}_3^-/\text{NO}_2^-$  interconversion on the N isotope distribution between  $\text{NO}_3^-$  and  $\text{NO}_2^-$  can vary from null to a strong partitioning of  $^{14}\text{N}$  to  $\text{NO}_2^-$ . We further defined the lower 2.5th percentile of the error-weighted residual sum of squares (RSS) between simulated and measured  $\delta^{15}\text{N}$  values of  $\text{NO}_3^-$ ,  $\text{NO}_2^-$ , and

NO as the threshold for selection of the best-fit models. Detailed information regarding model optimization can be found in the Supplement (Text S3.2).

Results from the first modeling step are summarized in Table 1 and the best-fit models were plotted in Fig. 2 to compare with the measured data. Because the NXR-catalyzed  $\text{NO}_3^-/\text{NO}_2^-$  interconversion was assumed to result in no change in  $\text{NO}_3^-$  and  $\text{NO}_2^-$  concentrations,  $R_{\text{NAR}}$  ( $0.158 \mu\text{g N}\cdot\text{g}^{-1}\cdot\text{h}^{-1}$ ),  $R_{\text{NIR}}$  ( $0.112 \mu\text{g N}\cdot\text{g}^{-1}\cdot\text{h}^{-1}$ ), and  $R_{\text{NOR}}$  ( $0.039 \mu\text{g N}\cdot\text{g}^{-1}\cdot\text{h}^{-1}$ ) can be well-described by zero-order kinetics and are not sensitive to model scenarios for O exchange between  $\text{NO}_2^-$  and  $\text{H}_2\text{O}$  (Table 1). Moreover, the observed  $\text{NO}_2^-$  accumulation and  $f_{\text{NO-anoxic}}$  dynamics can be well-reproduced using the modeled denitrification rates and the downward adjustment of  $k_{\text{abiotic}}$  (Fig. 2b and 2c).  $k_{\text{NXR(b)}}$  was estimated to be  $0.64 \text{ h}^{-1}$  and  $0.25 \text{ h}^{-1}$  under the “no exchange” and “complete exchange” scenarios, respectively (Table 1). Under both scenarios, the simulated  $\Delta^{17}\text{O-NO}_3^-$  values exhibit a characteristic decreasing trend and are in excellent agreement with measured  $\Delta^{17}\text{O-NO}_3^-$  values (Fig. 2h). The larger  $k_{\text{NXR(b)}}$  under the “no exchange” scenario is expected and can be explained by the faster back reaction (i.e.,  $\text{NO}_2^-$  re-oxidation) required to reproduce the observed dilution of  $\Delta^{17}\text{O-NO}_3^-$ , because only one “new” O atom is incorporated into  $\text{NO}_3^-$  with each  $\text{NO}_2^-$  molecule being re-oxidized. Although the measured  $\delta^{18}\text{O-NO}_3^-$  values did not provide quantitative constraints for the model optimization, the isotopologue-specific model with the optimized denitrification rates and  $k_{\text{NXR(b)}}$  was run forward to test whether the decreasing  $\delta^{18}\text{O-NO}_3^-$  values can also be possibly explained by co-occurring denitrification and  $\text{NO}_2^-$  re-oxidation (details are provided in Text S4 in the Supplement). The results showed that  $\text{NO}_3^-$  reduction (acting to increase  $\delta^{18}\text{O-NO}_3^-$  values) and  $\text{NO}_2^-$  re-oxidation (acting to decrease  $\delta^{18}\text{O-NO}_3^-$  values) have counteracting effects on the forward-modeled  $\delta^{18}\text{O-NO}_3^-$  (Fig. S2 in the Supplement) and that the decreasing trend in  $\delta^{18}\text{O-NO}_3^-$  values can be well-reproduced under both “no exchange” and “complete exchange” scenarios with a reasonable assumption on the net O isotope effects for denitrification and  $\text{NO}_2^-$  re-oxidation (Fig. S2; see Text S4 in the Supplement) (Granger and Wankel, 2016). Therefore, although  $k_{\text{NXR(b)}}$  cannot be definitively quantified in this study due to the unknown degree of O exchange between  $\text{NO}_2^-$  and  $\text{H}_2\text{O}$ , these simulation results provide confidence in our hypothesis that the observed decreases in  $\delta^{18}\text{O-NO}_3^-$  and  $\Delta^{17}\text{O-NO}_3^-$  values were driven by the reversible action of the NXR enzyme. It is important to note that the estimated  $k_{\text{NXR(b)}}$  is fairly large even under the “complete exchange” scenario. Based on the  $\text{NO}_2^-$  concentration measured at the end of the anoxic incubation ( $6.9 \mu\text{g N}\cdot\text{g}^{-1}$ ), a  $k_{\text{NXR(b)}}$  of  $0.25 \text{ h}^{-1}$  would require a  $\text{NO}_2^-$  re-oxidation rate ( $1.7 \mu\text{g N}\cdot\text{g}^{-1}\cdot\text{h}^{-1}$ ) that is one order of magnitude higher than the estimated  $R_{\text{NAR}}$  and  $R_{\text{NIR}}$ . However, the inferred maximum  $\text{NO}_2^-$  re-oxidation rate under either model scenario ( $1.7$  to  $4.4 \mu\text{g N}\cdot\text{g}^{-1}\cdot\text{h}^{-1}$ ) is still within the reported range for aerobic  $\text{NO}_2^-$  oxidation in agricultural soils (e.g., up to  $6\text{--}7 \mu\text{g N}\cdot\text{g}^{-1}\cdot\text{h}^{-1}$ ) (Taylor et al., 2019), indicative of high NOB activity even under anoxic conditions (Koch et al., 2015). It is also noteworthy that  $\Delta^{17}\text{O}$  analysis of  $\text{NO}_2^-$  can in theory provide quantitative constraint on the degree of O isotope exchange between  $\text{NO}_2^-$  and  $\text{H}_2\text{O}$  during the anoxic incubation, as has been previously demonstrated by  $\Delta^{17}\text{O}$  analysis of  $\text{N}_2\text{O}$  to determine O exchange between  $\text{N}_2\text{O}$  and  $\text{H}_2\text{O}$  during denitrification (Lewicka-Szczębak et al., 2016). However, in this study, robust  $\Delta^{17}\text{O-NO}_2^-$  analysis was confounded by the low  $\text{NO}_2^-$  concentrations as well as the fact that  $\text{NO}_2^-$  can undergo O exchange with  $\text{H}_2\text{O}$  during sample processing and storage (Casciotti et al., 2007). Future development in soil  $\Delta^{17}\text{O-NO}_2^-$  analysis and calibration will benefit the use of  $\Delta^{17}\text{O}$  to disentangle  $\text{NO}_2^-$  reaction complexity in soil environments.

Based on the modeled denitrification rates and  $k_{\text{NXR}(b)}$ , the best-fit  $^{15}\eta_{\text{NXR}(b)}$  was confined to a narrow range from -40 to -35‰ (Fig. 7a and 7b) and was not sensitive to model scenarios for O equilibration between  $\text{NO}_2^-$  and  $\text{H}_2\text{O}$  (Fig. 8b). While the best-fit  $^{15}\eta_{\text{NAR}}$  and  $^{15}\eta_{\text{NXR}(b)}$  were positively correlated, especially under the “complete exchange” scenario (Fig. 7a and 7b), the best-fit  $^{15}\eta_{\text{NAR}}$  spanned a wide range (5 to 45‰) and was significantly  
580 lower under the “no exchange” scenario (RSS-weighted mean: 19‰) relative to the “complete exchange” scenario (RSS-weighted mean: 30‰) (Fig. 8a). On the other hand, the best-fit  $^{15}\eta_{\text{NIR}}$  (15 to 22‰) and  $^{15}\eta_{\text{NOR}}$  (-8 to 2‰) did not vary substantially and were similar between the two model scenarios (Fig. 7c to 7d; Fig. 8c and 8d). Under both model scenarios, the measured  $\delta^{15}\text{N-NO}_3^-$ ,  $\delta^{15}\text{N-NO}_2^-$ , and  $\delta^{15}\text{N-NO}$  values can be well-simulated using the RSS-weighted mean  $^{15}\eta$  values from the best-fit models (Fig. 2d to 2f). Specifically, the modeled difference between  
585  $\delta^{15}\text{N-NO}_3^-$  and  $\delta^{15}\text{N-NO}_2^-$  values increased from about 29‰ at the beginning of the incubation to about 38‰ at the end of the incubation (Fig. 2d and 2e), whereas a constant  $\delta^{15}\text{N}$  offset of about 20‰ was revealed between the modeled  $\delta^{15}\text{N-NO}_2^-$  and  $\delta^{15}\text{N-NO}$  values (Fig. 2e and 2f). Therefore, the modeled  $^{15}\eta$  values and  $\delta^{15}\text{N-NO}_2^-$  dynamics reveal important new information for understanding the increasing  $^{15}\eta_{\text{NO}_3/\text{NO}}$  over the anoxic incubation. During the early phase of the incubation, the N isotope partitioning between  $\text{NO}_3^-$ ,  $\text{NO}_2^-$ , and  $\text{NO}$  was mainly  
590 controlled by denitrification and its associated isotope effects (i.e.,  $^{15}\eta_{\text{NAR}}$ ,  $^{15}\eta_{\text{NIR}}$ , and  $^{15}\eta_{\text{NOR}}$ ). With the increasing accumulation of  $\text{NO}_2^-$  in the soil, the dominant control on the  $\delta^{15}\text{N}$  distribution shifted to the N isotope exchange between  $\text{NO}_3^-$  and  $\text{NO}_2^-$ , so that the difference between the  $\delta^{15}\text{N-NO}_3^-$  and  $\delta^{15}\text{N-NO}_2^-$  values was primarily determined by  $^{15}\eta_{\text{NXR}(eq)}$  (-40 to -35‰). The revealed positive correlation between the best-fit  $^{15}\eta_{\text{NAR}}$  and  $^{15}\eta_{\text{NXR}(b)}$  (Fig. 7a and 7b) and the significantly lower  $^{15}\eta_{\text{NAR}}$  under the “no exchange” scenario (Fig. 8a) essentially reflect a  
595 trade-off between  $^{15}\eta_{\text{NAR}}$  and  $^{15}\eta_{\text{NXR}(b)}$  in controlling the  $\delta^{15}\text{N}$  difference between  $\text{NO}_3^-$  and  $\text{NO}_2^-$  – that is, when the interconversion between  $\text{NO}_3^-$  and  $\text{NO}_2^-$  is fast and the magnitude of  $^{15}\eta_{\text{NXR}(eq)}$  is large (i.e., very negative), only a small  $^{15}\eta_{\text{NAR}}$  is required to sustain the large  $\delta^{15}\text{N}$  difference between  $\text{NO}_3^-$  and  $\text{NO}_2^-$  over the course of the anoxic incubation.

The estimated  $^{15}\eta_{\text{NXR}(eq)}$  from the best-fit models is higher (i.e., closer to zero) than those derived from  
600 theoretical calculations and pure culture studies (-50 to -60‰) (Casciotti, 2009; Brunner et al., 2013). Given the heterogeneous distribution of substrates in soils, the lower absolute magnitude of the best-fit  $^{15}\eta_{\text{NXR}(eq)}$  may be due to the partial rate limitation by transport of  $\text{NO}_2^-/\text{NO}_3^-$  to the active site of NXR. As such, the best-fit  $^{15}\eta_{\text{NXR}(eq)}$  should provide a conservative estimate of the intrinsic equilibrium isotope effect. Thus, the results from the anoxic  
605 incubation underscore the important, yet previously unrecognized, role of the reversible  $\text{NO}_3^-/\text{NO}_2^-$  interconversion in controlling the  $\delta^{15}\text{N}$  dynamics of soil  $\text{NO}_3^-$  and its denitrification products. Substantial re-oxidation of  $\text{NO}_2^-$  under anoxic conditions seems paradoxical, but is underpinned by the increasingly recognized high degree of metabolic  
610 versatility of NOB, including simultaneous oxidation of an organic substrate and  $\text{NO}_2^-$ , as well as parallel use of  $\text{NO}_3^-$  and  $\text{O}_2$  as electron acceptors (Koch et al., 2015). In the absence of  $\text{O}_2$ , few electron acceptors exist at common environmental pH that have a higher redox potential than the  $\text{NO}_3^-/\text{NO}_2^-$  pair (Wunderlich et al., 2013; Babbín et al., 2017). It is therefore likely that NOB would gain energy by performing the intracellular coupled oxidation of  $\text{NO}_2^-$  and reduction of  $\text{NO}_3^-$  to survive periods of  $\text{O}_2$  deprivation. Although anaerobic  $\text{NO}_2^-$  oxidation until now has been conclusively shown only in anoxic ocean water columns (Sun et al., 2017; Babbín et al., 2017) and aquatic

615 sediments (Wunderlich et al., 2013), soils host a huge diversity of coexisting NOB (Le Roux et al., 2016) and the  
physiological flexibility of NOB beyond aerobic NO<sub>2</sub><sup>-</sup> oxidation may contribute to the unexpected higher  
abundances and activities of NOB relative to AOB and AOA in agricultural soils (Høberg et al., 1996; Ke et al.,  
2013). Using the modified isotopologue-specific model, we demonstrate the possibility that large <sup>15</sup>η<sub>NAR</sub> can be an  
artifact of an isotopic equilibrium between NO<sub>3</sub><sup>-</sup> and NO<sub>2</sub><sup>-</sup>, occurring in connection with the bifunctional NXR  
enzyme. Therefore, effective expressions of <sup>15</sup>η<sub>NXR(eq)</sub> in concurrence with <sup>15</sup>η<sub>NAR</sub> may explain why <sup>15</sup>η<sub>NAR</sub> estimated  
620 by some anoxic soil incubations (e.g., 25 to 65‰) are far larger than those reported by studies of denitrifying and  
NO<sub>3</sub><sup>-</sup>-reducing bacterial cultures (e.g., 5 to 30‰) (Denk et al., 2017) and why the slope of δ<sup>18</sup>O-NO<sub>3</sub><sup>-</sup> versus δ<sup>15</sup>N-  
NO<sub>3</sub><sup>-</sup> values during denitrification in many field studies was not constant and rarely close to unity as observed in  
pure denitrifying cultures (Granger and Wankely, 2016). Indeed, evidence for a reversible enzymatic pathway  
linking NO<sub>3</sub><sup>-</sup> and NO<sub>2</sub><sup>-</sup> under anoxic conditions has already been documented in previous soil studies (e.g., Kool et  
al., 2011; Lewicka-Szczebak et al., 2014), implying its wide occurrence in soils. More studies using soils from a  
625 broad range of environments are needed to pinpoint the exact mechanisms by which NO<sub>2</sub><sup>-</sup> can be anaerobically  
oxidized in soils. To that end, Δ<sup>17</sup>O-NO<sub>3</sub><sup>-</sup> can be used as a powerful benchmark for disentangling co-occurring NO<sub>3</sub><sup>-</sup>  
reduction and NO<sub>2</sub><sup>-</sup> re-oxidation.

The best-fit <sup>15</sup>η<sub>NIR</sub> (15 to 22‰) falls within the range derived in anoxic soil incubations (11 to 33‰)  
(Mariotti et al., 1982) and is consistent with results based on denitrifying bacteria carrying copper-containing NIR  
630 (22‰) (Martin and Casciotti, 2016). Under both model scenarios, the best-fit <sup>15</sup>η<sub>NOR</sub> (-8 to 2‰) is relatively small  
and more normal (*i.e.* <sup>15</sup>η value closer to zero) than the bulk N isotope effect for NO reduction to N<sub>2</sub>O catalyzed by  
purified fungal NOR (P450nor) (-14‰) (Yang et al., 2014). During P450nor-catalyzed NO reduction, two NO  
molecules are sequentially bonded to the Fe active site of P450nor and the observed inverse isotope effect was  
proposed to arise from a reversible bonding of the first NO molecule (Yang et al., 2014). To date, the N isotope  
635 effect for NO reduction catalyzed by bacterial NORs has not yet been quantified. Unlike P450nor, which contains  
only a single heme Fe at the active site, the active site of bacterial NORs has two Fe atoms (*i.e.*, binuclear center).  
Therefore, three classes of mechanisms have been proposed for the two-electron reduction of NO by bacterial  
NORs, including sequential bonding of two NO molecules to either Fe catalytic center and simultaneous bonding of  
two NO molecules to both Fe centers (Kuypers et al., 2018; Lehnert et al., 2018). Although the precise catalytic  
640 mechanism remains uncertain, site-specific measurements of N isotopes in N<sub>2</sub>O (*i.e.*, N<sub>2</sub>O isotopomers) produced  
from denitrifying bacteria indicate similar magnitude for isotopic fractionations during the reduction of two NO  
molecules, in support of the simultaneous binding theory (Sutka et al., 2006; Yamazaki et al., 2014). Thus, if the  
bulk N isotope effect for bacterial NO reduction is higher than that for fungal NO reduction, the best-fit <sup>15</sup>η<sub>NOR</sub> may  
reflect a mixed contribution of bacteria and fungi to NO consumption during the anoxic incubation. Alternatively,  
645 the model-inferred <sup>15</sup>η<sub>NOR</sub> might reflect a balance between enzymatic and diffusion isotope effects, as has been  
previously demonstrated for N<sub>2</sub>O reduction in soil denitrification (Lewicka-Szczebak et al., 2014). Because  
diffusion would be expected to have a small and normal kinetic isotope effect, if NO<sub>2</sub><sup>-</sup> reduction was limited by NO  
diffusion out of soil denitrifying sites, the estimated <sup>15</sup>η<sub>NOR</sub> would be shifted toward the isotope effect for NO  
diffusion. Diffusion might be particularly important in this study due to the flow-through condition during the

650 anoxic incubation and the low solubility of NO, both of which favor gas diffusion while preventing re-entry of  
escaped NO to denitrifying cells. Thus, the small  $^{15}\eta_{\text{NOR}}$  inferred from the best-fit models is likely a combination of  
diverse NO reduction pathways in this agricultural soil, as well as limited expression of enzymatic isotope effects  
imposed by NO diffusion. Regardless, the empirical finding of this study suggests that due to the small  $^{15}\eta_{\text{NOR}}$ , the  
655 bulk  $\delta^{15}\text{N}$  values of denitrification-produced  $\text{N}_2\text{O}$  should not be significantly altered by accumulation and diffusion  
of NO during denitrification.

#### 4.3 NO source contribution and N isotope effects for NO production from $\text{NH}_4^+$ oxidation under oxic and hypoxic conditions

The coupled decrease in  $\text{NH}_4^+$  concentrations and increase in  $\text{NO}_3^-$  concentrations (Fig. 3a and 3b) indicate active  
nitrification in both oxic and hypoxic incubations. Moreover, the two oxidation steps of nitrification were tightly  
660 coupled, resulting in no accumulation of  $\text{NO}_2^-$  in the soil. Because  $\text{NO}_3^-$  produced from nitrification has a zero  $\Delta^{17}\text{O}$   
value, the active nitrification was also reflected in the progressive dilution of  $\Delta^{17}\text{O}-\text{NO}_3^-$  under both oxic and  
hypoxic conditions (Yu and Elliott, 2018). Based on the measured concentrations and isotopic composition of  $\text{NH}_4^+$   
and  $\text{NO}_3^-$ , the isotopologue-specific model previously developed by Yu and Elliott (2018) was used to estimate the  
rates and net N isotope effects of net mineralization ( $R_{\text{OrgN/NH}_4}$  and  $^{15}\eta_{\text{OrgN/NH}_4}$ ), gross  $\text{NH}_4^+$  oxidation to  $\text{NO}_3^-$   
665 ( $R_{\text{NH}_4/\text{NO}_3}$  and  $^{15}\eta_{\text{NH}_4/\text{NO}_3}$ ), and gross  $\text{NO}_3^-$  consumption ( $R_{\text{NO}_3\text{comp}}$  and  $^{15}\eta_{\text{NO}_3\text{comp}}$ ) during the oxic and hypoxic  
incubations. As ~~have has~~ been discussed above, this numerical model relies on the conservative nature of  $\Delta^{17}\text{O}-\text{NO}_3^-$   
and its powerful applications in tracing co-occurring nitrification and  $\text{NO}_3^-$  consumption (consisting of  $\text{NO}_3^-$   
immobilization and denitrification in this case) (Yu and Elliott, 2018). Detailed model derivation, formulation, and  
optimization have been documented in Yu and Elliott (2018) and are also briefly summarized in Text S5 in the  
670 Supplement. The modeling results based on the low  $\delta^{15}\text{N}-\text{NH}_4^+$  treatment in the oxic incubation were reported by Yu  
and Elliott (2018). Here, we used data from all three  $\delta^{15}\text{N}-\text{NH}_4^+$  treatments to more robustly constrain the N  
transformation rates and net N isotope effects for each incubation experiment (i.e., oxic and hypoxic).

The modeling results ~~were-are~~ summarized in Table 2. Excellent agreement was obtained between the  
observed and simulated concentrations and isotopic composition of  $\text{NH}_4^+$  and  $\text{NO}_3^-$  for both oxic and hypoxic  
675 incubations (Fig. 3).  $R_{\text{NH}_4/\text{NO}_3}$  can be well described by zero order kinetics and was estimated to be  $0.46 \mu\text{g N}\cdot\text{g}^{-1}\cdot\text{h}^{-1}$   
and  $0.11 \mu\text{g N}\cdot\text{g}^{-1}\cdot\text{h}^{-1}$  for the oxic and hypoxic incubations, respectively (Table 2). The lower  $R_{\text{NH}_4/\text{NO}_3}$  in the hypoxic  
incubation indicates that nitrification was limited by low  $\text{O}_2$  availability. Under both oxic and hypoxic conditions,  
oxidation of  $\text{NH}_4^+$  to  $\text{NO}_3^-$  was associated with a large  $^{15}\eta_{\text{NH}_4/\text{NO}_3}$  (23 to 28‰; Table 2), consistent with the N isotope  
effects for  $\text{NH}_3$  oxidation in pure cultures of AOB and AOA (e.g., 13 to 41‰) (Mariotti et al., 1981; Casciotti et al.,  
680 2003; Santoro et al., 2011). On the other hand, the estimated  $R_{\text{OrgN/NH}_4}$  and  $R_{\text{NO}_3\text{comp}}$  were low and not significantly  
different between the two incubation experiments (Table 2). Nevertheless, while  $R_{\text{NO}_3\text{comp}}$  was only 16% of  $R_{\text{NH}_4/\text{NO}_3}$   
in the oxic incubation,  $R_{\text{NO}_3\text{comp}}$  accounted for a much larger fraction (63%) of  $R_{\text{NH}_4/\text{NO}_3}$  in the hypoxic incubation,  
mainly due to the reduced  $R_{\text{NH}_4/\text{NO}_3}$  under the low  $\text{O}_2$  condition. Due to the low magnitude of  $R_{\text{OrgN/NH}_4}$  and  $R_{\text{NO}_3\text{comp}}$ ,  
the estimated  $^{15}\eta_{\text{OrgN/NH}_4}$  and  $^{15}\eta_{\text{NO}_3\text{comp}}$  are associated with large errors and not significantly different from zero  
685 (Table 2).

By using three isotopically different  $\text{NH}_4^+$  fertilizers in parallel treatments, we are able to quantify the fractional contribution of  $\text{NH}_4^+$  oxidation to the measured net NO production ( $f_{\text{NH}_4}$ ). Specifically, if NO was exclusively produced from soil  $\text{NH}_4^+$ , we would expect to see a constant  $\delta^{15}\text{N}$  difference between  $\text{NH}_4^+$  and NO across the three  $\delta^{15}\text{N}\text{-NH}_4^+$  treatments. In fact, the observed  $\delta^{15}\text{N}$  differences were not constant and the slope of  $\delta^{15}\text{N}\text{-NH}_4^+$  versus  $\delta^{15}\text{N}\text{-NO}$  was significantly lower than unity under both oxic and hypoxic conditions (Fig. 4). This suggests that sources other than  $\text{NH}_4^+$  oxidation contributed to the observed net NO production. Although NO can be produced by numerous microbial and abiotic processes (Medinets et al., 2015), we argue that the other major NO source is mostly likely related to  $\text{NO}_3^-$  consumption. This is based on the observation of high  $\text{NO}_3^-$  concentrations in both oxic and hypoxic incubations, as well as the estimated low  $R_{\text{OrgN/NH}_4}$  (Table 2), which indicates a low availability of labile organic N – another potential substrate for NO production (Stange et al., 2013) – in this agricultural soil. Therefore, based on the assumption that  $\text{NH}_4^+$  oxidation and  $\text{NO}_3^-$  consumption were the two primary NO sources during the oxic and hypoxic incubations, a two-source isotope mixing model was used to relate the measured  $\delta^{15}\text{N}\text{-NO}$  values to the concurrently measured  $\delta^{15}\text{N}\text{-NH}_4^+$  and  $\delta^{15}\text{N}\text{-NO}_3^-$  values:

$$\delta^{15}\text{N}\text{-NO} = f_{\text{NH}_4} \times (\delta^{15}\text{N}\text{-NH}_4^+ - {}^{15}\eta_{\text{NH}_4/\text{NO}}) + (1 - f_{\text{NH}_4}) \times (\delta^{15}\text{N}\text{-NO}_3^- - {}^{15}\eta_{\text{NO}_3/\text{NO}}) \quad \text{Equation (5)}$$

where  ${}^{15}\eta_{\text{NH}_4/\text{NO}}$  and  ${}^{15}\eta_{\text{NO}_3/\text{NO}}$  are the net isotope effects for NO production from  $\text{NH}_4^+$  oxidation and  $\text{NO}_3^-$  consumption, respectively. Rearranging Equation (5) yields Equation (6):

$$\delta^{15}\text{N}\text{-NO} = f_{\text{NH}_4} \times \delta^{15}\text{N}\text{-NH}_4^+ + (1 - f_{\text{NH}_4}) \times \delta^{15}\text{N}\text{-NO}_3^- - [f_{\text{NH}_4} \times {}^{15}\eta_{\text{NH}_4/\text{NO}} + (1 - f_{\text{NH}_4}) \times {}^{15}\eta_{\text{NO}_3/\text{NO}}] \quad \text{Equation (6)}$$

$${}^{15}\eta_{\text{comb}} = f_{\text{NH}_4} \times {}^{15}\eta_{\text{NH}_4/\text{NO}} + (1 - f_{\text{NH}_4}) \times {}^{15}\eta_{\text{NO}_3/\text{NO}} \quad \text{Equation (7)}$$

$$\delta^{15}\text{N}\text{-NO} = f_{\text{NH}_4} \times \delta^{15}\text{N}\text{-NH}_4^+ + (1 - f_{\text{NH}_4}) \times \delta^{15}\text{N}\text{-NO}_3^- - {}^{15}\eta_{\text{comb}} \quad \text{Equation (8)}$$

Equation (6) essentially dictates that the  $\delta^{15}\text{N}\text{-NO}$  values can be modeled from the  $\delta^{15}\text{N}\text{-NH}_4^+$  and  $\delta^{15}\text{N}\text{-NO}_3^-$  values using a hypothetical isotope effect for NO production from the combined soil  $\text{NH}_4^+$  and  $\text{NO}_3^-$  pool ( ${}^{15}\eta_{\text{comb}}$ ; the last term in Equation (6)) that is a mixing of  ${}^{15}\eta_{\text{NH}_4/\text{NO}}$  and  ${}^{15}\eta_{\text{NO}_3/\text{NO}}$  controlled by  $f_{\text{NH}_4}$  (Equation 7). Thus, assuming  $f_{\text{NH}_4}$  and  ${}^{15}\eta_{\text{comb}}$  were constant in each incubation experiment,  $f_{\text{NH}_4}$  and  ${}^{15}\eta_{\text{comb}}$  can be solved using the measured  $\delta^{15}\text{N}\text{-NO}$ ,  $\delta^{15}\text{N}\text{-NH}_4^+$ , and  $\delta^{15}\text{N}\text{-NO}_3^-$  values from all three  $\delta^{15}\text{N}\text{-NH}_4^+$  treatments (Equation 8).  $f_{\text{NH}_4}$  was estimated to be 0.72 under the oxic incubation (Table 2), indicating that 72% of the measured net NO production was sourced from  $\text{NH}_4^+$  oxidation, with the remainder being ascribed to  $\text{NO}_3^-$  consumption. Under the hypoxic condition, the share of  $\text{NH}_4^+$  oxidation decreased to 58% (Table 2).  ${}^{15}\eta_{\text{comb}}$  was estimated to be 56‰ under the oxic condition and 51‰ under the hypoxic condition (Table 2). Combining the  $\delta^{15}\text{N}$ -based NO source partitioning with the estimated  $R_{\text{NH}_4/\text{NO}_3}$  and  $R_{\text{NO}_3/\text{comp}}$ , we further estimated NO yield in  $\text{NH}_4^+$  oxidation and  $\text{NO}_3^-$  consumption, respectively, and where the results are illustrated according to the classic “hole-in-the-pipe” (HIP) concept (Fig 9) (Davidson and Verchot, 2000). NO yield was 1.3% in  $\text{NH}_4^+$  oxidation and 3.2% in  $\text{NO}_3^-$  consumption in the oxic incubation (Fig. 9; Table 2). Under the hypoxic condition, NO yield was increased to 5.2% in  $\text{NH}_4^+$  oxidation and 6.1% in  $\text{NO}_3^-$  consumption (Fig. 9; Table 2).

Most previous laboratory and field studies suggest that soil NO emissions are predominately driven by nitrification, whereas NO produced from denitrification is further reduced to  $\text{N}_2\text{O}$  before it escapes to the soil surface (Kester et al., 1997; Skiba et al., 1997). The minor role of denitrification is largely deduced from the supposition that denitrification is activated only under wet soil conditions (Davidson and Verchot, 2000). However,

based on our  $\delta^{15}\text{N}$ -based NO source partitioning, about 30% of the net NO production was contributed by  $\text{NO}_3^-$  consumption under oxic condition, highlighting the potential importance of denitrification in driving soil NO emissions under conditions not typically conducive to its occurrence. There is growing evidence that extensive anoxic microsites can develop in otherwise well-aerated soils due to micro-scale variability of  $\text{O}_2$  demand and soil texture-dependent gas diffusion limitations (Keiluweit et al. 2018). Although we would not predict high rates of heterotrophic respiration in this agricultural soil with low organic carbon, it is possible that rapid  $\text{O}_2$  consumption by nitrification may outpace  $\text{O}_2$  supply through diffusion in soil microsites, fostering development of anoxic niches in close association with nitrification hot spots (Kremen et al., 2005). Based on  $^{15}\text{N}$  labeling and direct  $^{15}\text{NO}$  measurements using a gas chromatograph-quadrupole mass spectrometer, Russow et al. (2009) demonstrated that nitrification contributed about 70% of net NO production in a well-aerated,  $\text{NH}_4^+$ -fertilized silt loam, in strong agreement with our results based on natural abundance  $\delta^{15}\text{N}$  measurements. An even lower contribution to NO production, e.g., 26 to 44%, has been reported for nitrification in organic, N-rich forest soils incubated under oxic conditions (Stange et al., 2013). The persistence of denitrifying microsites in the studied soil is further corroborated by the nearly doubled net NO production from  $\text{NO}_3^-$  consumption in the hypoxic incubation (Fig. 9). Importantly, the actual NO yield in denitrification might be much higher than those estimated for gross  $\text{NO}_3^-$  consumption during the oxic and hypoxic incubations (i.e., 3.2% and 6.1%), as denitrification occurring in anoxic niches might only comprise a small fraction of the estimated  $R_{\text{NO}_3\text{comp}}$ .

Interestingly, while  $R_{\text{NH}_4/\text{NO}_3}$  was significantly lower in the hypoxic incubation, the net NO production from  $\text{NH}_4^+$  oxidation was similar between the two incubation experiments, indicating a higher NO yield in nitrification when  $\text{O}_2$  availability became limited (Fig. 9). However, mechanisms underlying the differential NO yield in nitrification are difficult to elucidate owing to the high complexity of biochemical pathways of NO production by AOB and AOA. In AOB, the prevailing view of  $\text{NH}_3$  oxidation is that it occurs via a two-step enzymatic process, involving hydroxylamine ( $\text{NH}_2\text{OH}$ ) as an obligatory intermediate (Fig. 10). The first step is catalyzed by  $\text{NH}_3$  monooxygenase (AMO), which uses copper and  $\text{O}_2$  to hydroxylate  $\text{NH}_3$  to  $\text{NH}_2\text{OH}$ . Next, a multiheme enzyme,  $\text{NH}_2\text{OH}$  oxidoreductase (HAO), catalyzes the four-electron oxidation of  $\text{NH}_2\text{OH}$  to  $\text{NO}_2^-$  via enzyme-bound nitroxyl ( $[\text{HNO-Fe}]$ ) and nitrosyl ( $[\text{NO-Fe}]$ ) intermediates (Lehnert et al., 2018) (Fig. 10). Under this ‘ $\text{NH}_2\text{OH}$  obligate intermediate’ model, NO emission was proposed to result from dissociation of NO from the enzyme-bound nitrosyl complex under high  $\text{NH}_3$  and/or low  $\text{O}_2$  conditions (Fig. 10) (Hooper et al., 2005; Beeckman et al., 2018). However, there is recent strong evidence that HAO generally catalyzes the three-electron oxidation of  $\text{NH}_2\text{OH}$  to NO under both aerobic and anaerobic conditions; the HAO-produced NO is further oxidized to  $\text{NO}_2^-$  by an unknown enzyme (Caranto et al., 2017). In this way, NO would not be a byproduct of incomplete  $\text{NH}_2\text{OH}$  oxidation, but rather required as an obligatory intermediate for  $\text{NO}_2^-$  production (Fig. 10). It was further proposed that AOB-encoded copper-containing NIR may catalyze the final one-electron oxidation of NO to  $\text{NO}_2^-$  by operating in reverse (Lancaster et al., 2018). Under this ‘ $\text{NH}_2\text{OH}/\text{NO}$  obligate intermediate’ model, high intracellular NO concentrations arise when the rate of NO production outpaces the rate of its oxidation to  $\text{NO}_2^-$ , leading to NO leakage from cells. Consequently, under  $\text{O}_2$  stress, decreases in the rate of NO oxidation to  $\text{NO}_2^-$  might be expected, and this may explain the observed increase in nitrification NO yield in the hypoxic incubation. Additionally, some AOB strains



760 can produce NO in a process termed ‘nitrifier-denitrification’, in which NO is produced through NIR-catalyzed NO<sub>2</sub><sup>-</sup>  
reduction and can be further reduced to N<sub>2</sub>O by AOB-encoded NOR (Wrage-Mönning et al., 2018) (Fig. 10).  
Compared to AOB, the NH<sub>3</sub> oxidation pathway in AOA remains unclear (Beekman et al., 2018). The current model  
is that NH<sub>3</sub> is first oxidized by an archaeal AMO to NH<sub>2</sub>OH and subsequently converted to NO<sub>2</sub><sup>-</sup> by an unknown  
765 HAO counterpart (Kozłowski et al., 2016). NO seems to be mandatory for archaeal NH<sub>2</sub>OH oxidation and has been  
proposed to act as a co-substrate for the NO<sub>2</sub><sup>-</sup> production (Kozłowski et al., 2016). Consequently, NO is usually  
produced and immediately consumed with tighter control in AOA than in AOB (Kozłowski et al., 2016).

To shed further light on the inner workings of net NO production from NH<sub>4</sub><sup>+</sup>, we turn to constraining  
<sup>15</sup>η<sub>NH<sub>4</sub>/NO</sub>. Specifically, the inherent linkage between <sup>15</sup>η<sub>comb</sub>, <sup>15</sup>η<sub>NH<sub>4</sub>/NO</sub>, and <sup>15</sup>η<sub>NO<sub>3</sub>/NO</sub> (Equation 7) allows one to  
probe the relative magnitude of <sup>15</sup>η<sub>NH<sub>4</sub>/NO</sub> and <sup>15</sup>η<sub>NO<sub>3</sub>/NO</sub> using the determined <sup>15</sup>η<sub>comb</sub> and *f*<sub>NH<sub>4</sub></sub>. Given that NO<sub>2</sub><sup>-</sup> was  
770 absent in the soil and that NO reduction in denitrification was likely associated with a small isotope effect (i.e.,  
<sup>15</sup>η<sub>NOR</sub>; see above), <sup>15</sup>η<sub>NO<sub>3</sub>/NO</sub> in the oxic and hypoxic incubations should mainly reflect <sup>15</sup>η<sub>NAR</sub>. Thus, by assigning  
the entire possible range of the best-fit <sup>15</sup>η<sub>NAR</sub> derived in the anoxic incubation (5 to 45‰; Fig. 7a) to <sup>15</sup>η<sub>NO<sub>3</sub>/NO</sub>,  
<sup>15</sup>η<sub>NH<sub>4</sub>/NO</sub> was estimated to range from 60 to 76‰ in the oxic incubation and from 55 to 84‰ in the hypoxic  
incubation (Fig. 11). If we take one step further by assuming that both <sup>15</sup>η<sub>NO<sub>3</sub>/NO</sub> and <sup>15</sup>η<sub>NH<sub>4</sub>/NO</sub> were identical between  
775 the oxic and hypoxic incubations, then <sup>15</sup>η<sub>NO<sub>3</sub>/NO</sub> and <sup>15</sup>η<sub>NH<sub>4</sub>/NO</sub> could be uniquely determined to be 30‰ and 66‰,  
respectively (Fig. 11; Table 2). Thus, the relative magnitude of <sup>15</sup>η<sub>NO<sub>3</sub>/NO</sub> and <sup>15</sup>η<sub>NH<sub>4</sub>/NO</sub> provides insights into the  
differential relationship between δ<sup>15</sup>N-NH<sub>4</sub><sup>+</sup> and δ<sup>15</sup>N-NO across the three δ<sup>15</sup>N-NH<sub>4</sub><sup>+</sup> treatments in the oxic and  
hypoxic incubations (Fig. 4). In the oxic incubation, if we assume that <sup>15</sup>η<sub>NH<sub>4</sub>/NO</sub> = 66‰ and <sup>15</sup>η<sub>NO<sub>3</sub>/NO</sub> = 30‰, the  
780 δ<sup>15</sup>N of NO produced from NH<sub>4</sub><sup>+</sup> oxidation under the low δ<sup>15</sup>N-NH<sub>4</sub><sup>+</sup> treatment (about -60‰) would be much lower  
than the δ<sup>15</sup>N of NO from NO<sub>3</sub><sup>-</sup> consumption (about -38‰). However, under the high δ<sup>15</sup>N-NH<sub>4</sub><sup>+</sup> treatment, the δ<sup>15</sup>N  
of NH<sub>4</sub><sup>+</sup>-produced NO would increase to about -14‰ and be higher than δ<sup>15</sup>N values of NO<sub>3</sub><sup>-</sup>-produced NO (about -  
26‰). Consequently, the production of NO from NO<sub>3</sub><sup>-</sup> consumption would “dilute” the δ<sup>15</sup>N of total net NO  
production, pulling it to fall below the 1:1 line between the δ<sup>15</sup>N-NH<sub>4</sub><sup>+</sup> and δ<sup>15</sup>N-NO values in Fig. 4. This “dilution  
effect” was more pronounced in the hypoxic incubation due to the lower *f*<sub>NH<sub>4</sub></sub> (i.e., higher contribution of NO<sub>3</sub><sup>-</sup>-  
785 produced NO) (Fig. 4).

Therefore, under either oxic or hypoxic condition, the net NO production from NH<sub>4</sub><sup>+</sup> oxidation proceeded  
with a large <sup>15</sup>η<sub>NH<sub>4</sub>/NO</sub>. As NH<sub>3</sub> oxidation to NH<sub>2</sub>OH was likely the rate-limiting step for the entire nitrification  
process, a fraction of the inferred large <sup>15</sup>η<sub>NH<sub>4</sub>/NO</sub> can be accounted for by the isotope effect for NH<sub>3</sub> oxidation to  
NH<sub>2</sub>OH, which should be similar to the estimated <sup>15</sup>η<sub>NH<sub>4</sub>/NO<sub>3</sub></sub> (e.g., 23 to 28‰). The residual isotope effect, on the  
790 order of 40‰, must therefore stem from additional bond forming/breaking during net NO production in NH<sub>3</sub>  
oxidation. This additional N isotope effect could be explained by NO<sub>2</sub><sup>-</sup> reduction catalyzed by AOB-encoded NIR if  
NO was dominantly produced through the nitrifier-denitrification pathway (Fig. 10). However, provided that the two  
oxidation steps of nitrification were tightly coupled under both oxic and hypoxic conditions, it is unlikely that NO<sub>2</sub><sup>-</sup>  
would accumulate to high enough intracellular concentrations to trigger nitrifier-denitrification (Wrage-Mönning et  
al., 2018). Similarly, we would not expect any substantial isotope fractionations to result from accumulation of  
795 intracellular NH<sub>2</sub>OH or enzyme-bound intermediate species (e.g., [HNO-Fe] and [NO-Fe]). Thus, we are left with

either a large and normal isotope effect for NO dissociation from its enzyme-bound precursor if NO production was mainly routed through the 'NH<sub>2</sub>OH obligate intermediate' pathway or an inverse isotope effect associated with NO oxidation if NO itself was an obligatory intermediate required for NO<sub>2</sub><sup>-</sup> production (Fig. 10). With respect to the first possibility, if NO dissociation from the Fe active site of HAO is mainly controlled by an equilibrium reaction between NO and enzyme-bound nitrosyl species, the forward and backward reactions may occur with distinctively different isotope effects, giving rise to an equilibrium isotope effect that favors partitioning of <sup>14</sup>N to the dissociated NO. However, expression of this equilibrium isotope effect would be largely suppressed by limited isotope exchange between the two N pools due to the presumably transient presence of nitrosyl intermediate. Therefore, a partial expression of a large equilibrium isotope effect (e.g., > 40‰) would be required to explain the residual N isotopic fractionation during NO production in NH<sub>3</sub> oxidation. Alternatively, in regards to the second possibility, if we assume that the enzyme-catalyzed oxidation of NO to NO<sub>2</sub><sup>-</sup> proceeds via an enzyme-bound transition state and that the transition state contains the newly formed N-O bond, an inverse isotope effect may result from more strongly bonded N atom in the transition state, for which there is precedent in the literature (i.e., NO<sub>2</sub><sup>-</sup> oxidation to NO<sub>3</sub><sup>-</sup>; see above) (Casciotti et al., 2009). Moreover, the small NO yield observed in the oxic and hypoxic incubations would indicate a large consumption of NO (i.e., 95 to 99%). With this high level of NO consumption, an inverse isotope effect on the order of -13 to -9‰ would be sufficient to account for the residual isotope effect for net NO production from NH<sub>4</sub><sup>+</sup>. This inferred isotope effect is of similar magnitude to that reported for NXR-catalyzed NO<sub>2</sub><sup>-</sup> oxidation (i.e., -13‰) (Casciotti et al., 2009). However, to unambiguously determine the mechanisms giving rise to the large <sup>15</sup>η<sub>NH<sub>4</sub>NO</sub>, further biochemical analyses will be needed to clarify the enzymatic pathways responsible for NO production by AOB and AOA under relevant soil conditions. Nonetheless, the results presented here provide evidence that production of NO with low δ<sup>15</sup>N values may be a characteristic feature of nitrification in NH<sub>4</sub><sup>+</sup>-fertilized agricultural soils under both oxic and hypoxic conditions.

### 5 Implications for NO emission from agricultural soils

In this study, the net production rates and δ<sup>15</sup>N values of NO were measured under a range of controlled laboratory conditions. The results provide insights into how stable N and O isotopes can be effectively used to understand the reaction mechanisms by which NO is produced and consumed in soils. While nitrification is the commonly cited source for NO emissions from agricultural soils, the measured net NO production rates in this study highlight the great potential of abiotic NO<sub>2</sub><sup>-</sup> reduction and denitrification in driving NO production and release from agricultural soils and thus should not be overlooked when attributing field soil NO emissions. Indeed, because NO is a direct product or free intermediate in these processes, abiotic NO<sub>2</sub><sup>-</sup> reduction and denitrification may inherently have a larger NO yield – that is, a bigger “hole” for NO leaking in the HIP model (Davidson and Verchot, 2000). We conclude that the isotope-based measurement and modeling framework established in this work is a powerful tool to bridge NO production with gross N transformation processes in agricultural soils, thereby providing a quantitative way to parameterize the HIP model for modeling soil NO emissions under dynamic environmental conditions (e.g., varying temperature and soil moisture content).

The differences in the net isotope effects for NO production from abiotic NO<sub>2</sub><sup>-</sup> reduction, denitrification, and nitrification revealed in this study (Fig. 12a) suggest that δ<sup>15</sup>N-NO is a useful tracer for informing NO production pathways in agricultural soils. Specifically, the relatively small magnitude of <sup>15</sup>η<sub>NO<sub>2</sub>/NO(abiotic)</sub> indicates that δ<sup>15</sup>N-NO is particularly useful in probing the relative importance of NO production from abiotic versus microbial reactions, lending support to our previous finding based on rewetting of a dry forest soil that high δ<sup>15</sup>N values of rewetting-triggered NO pulses ~~was~~ were mainly contributed by chemical NO<sub>2</sub><sup>-</sup> reduction (Yu and Elliott, 2017). Moreover, the large <sup>15</sup>η<sub>NH<sub>4</sub>/NO</sub> revealed in the oxic and hypoxic incubations provides an empirical basis for discerning the relative role of NH<sub>4</sub><sup>+</sup> oxidation and NO<sub>3</sub><sup>-</sup> reduction in driving soil NO production and emissions. Interestingly, comparing the measured net isotope effects for NO production from abiotic NO<sub>2</sub><sup>-</sup> reduction, denitrification, and nitrification with those previously quantified for N<sub>2</sub>O production in soil incubations and pure cultures (Denk et al., 2017 and references therein; Jones et al., 2015; Wei et al., 2019), a similar pattern is evident across these three common production pathways for NO and N<sub>2</sub>O (Fig. 12a). This similarity reflects the intimate connection between NO and N<sub>2</sub>O turnover within each reaction pathway and provides strong evidence that simultaneous δ<sup>15</sup>N-NO and δ<sup>15</sup>N-N<sub>2</sub>O measurements can potentially yield unprecedented insights into the sources and processes controlling NO and N<sub>2</sub>O emissions from agricultural soils. However, on the other hand, the demonstrated reaction reversibility between NO<sub>2</sub><sup>-</sup> and NO<sub>3</sub><sup>-</sup> under anoxic conditions is a new complication that needs to be considered when using δ<sup>15</sup>N to examine soil NO and N<sub>2</sub>O emissions. As NO<sub>2</sub><sup>-</sup> is often accumulated in agricultural soils following fertilizer application (Venterea et al., 2020), expression of the equilibrium isotope effect between NO<sub>2</sub><sup>-</sup> and NO<sub>3</sub><sup>-</sup> in redox-dynamic surface soils may render δ<sup>15</sup>N-NO and δ<sup>15</sup>N-N<sub>2</sub>O less useful in tracing NO and N<sub>2</sub>O sources. Given that high soil NO<sub>2</sub><sup>-</sup> concentrations can trigger emission pulses of NO and N<sub>2</sub>O (Venterea et al., 2020), NO<sub>2</sub><sup>-</sup> accumulation should be taken as a critical sign for careful evaluation of the reaction complexity underlying δ<sup>15</sup>N distributions among the denitrification products.

To further assess the potential utility of δ<sup>15</sup>N measurements in source partitioning NO emissions from agricultural soils, we applied the estimated N isotope effects to the in situ δ<sup>15</sup>N-NO<sub>x</sub> measurements reported by Miller et al. (2018). Importantly, the soil used in this study was collected from the same farm where Miller et al. (2018) conducted their field measurements (e.g., the USDA-managed corn-soybean field in central Pennsylvania, USA). Hence, the derived isotope effects may be particularly relevant to their reported δ<sup>15</sup>N-NO<sub>x</sub> values due to similar soil microbial community structures. Because NO<sub>2</sub><sup>-</sup> accumulation was not reported by Miller et al. (2018), we consider nitrification and denitrification to be the primary sources for the observed NO (and, to a much less extent, NO<sub>2</sub>) emissions. Therefore, the <sup>15</sup>η<sub>NH<sub>4</sub>/NO</sub> and <sup>15</sup>η<sub>NO<sub>3</sub>/NO</sub> values derived in the oxic and hypoxic incubations (i.e., 66‰ and 30‰, respectively) were used in combination with the δ<sup>15</sup>N values of soil NH<sub>4</sub><sup>+</sup> and NO<sub>3</sub><sup>-</sup> reported in Miller et al. (2018) to calculate the δ<sup>15</sup>N endmembers for NO produced from NH<sub>4</sub><sup>+</sup> oxidation and NO<sub>3</sub><sup>-</sup> reduction. As shown in Fig. 12b, comparing the in situ δ<sup>15</sup>N-NO<sub>x</sub> measurements with the estimated isotopic endmembers provides a compelling picture of soil NO dynamics following manure application. Notably, the initial low δ<sup>15</sup>N-NO<sub>x</sub> values reported by Miller et al. (2018) might indicate a mixed contribution of NH<sub>4</sub><sup>+</sup> oxidation and NO<sub>3</sub><sup>-</sup> reduction to soil NO<sub>x</sub> emissions (Fig. 12b). Nevertheless, the increase in δ<sup>15</sup>N-NO<sub>x</sub> values measured 4 to 11 d after manure application may reflect a shift in dominant NO production pathway to denitrification, in line with the increasing

870 accumulation of  $\text{NO}_3^-$  supplied by nitrification in the soil (Miller et al., 2018). Although data-limited, this example provides promising initial evidence for the ability of multi-species  $\delta^{15}\text{N}$  measurements to provide mechanistic information on soil NO dynamics and its environmental controls. Further experimental constraints on soil  $\delta^{15}\text{N}$ -NO variations can build on the measurement and modeling framework developed in this study to advance our understanding of soil NO source contributions over a wide range of environmental conditions and soil types.

875 *Data availability.* The datasets generated for this study and documentation about the equations and parameters of the isotopologue-specific models are available in the Supplement.

*Supplement.* The supplement related to this article is available online at:

880 *Author contributions.* Z.Y. and E.M.E. designed the study; Z.Y. conducted the experiments and analyzed the data; Z.Y. and E.M.E. wrote the paper.

*Competing interests.* The authors declare no conflict of interest.

885 *Acknowledgements.* The authors thank Dr. Curtis Dell (USDA-ARS) for helping with the field soil sampling, and Katherine Redling, Vivian Feng, Madeline Ellgass, and Madeline Gray (University of Pittsburgh) for assistance with the isotopic analyses.

*Financial statement.* This work was supported by a National Science Foundation CAREER award (Grant No. 890 1253000) to E.M.E.

## References

- Almaraz M., Bai E., Wang C., Trousdell J., Conley S., Faloona I. and Houlton B. Z.: Agriculture is a major source of  $\text{NO}_x$  pollution in California, *Sci. Adv.*, 4, 3477, 2018.
- 895 Babbin A. R., Peters B. D., Mordy C. W., Widner B., Casciotti K. L. and Ward B. B.: Multiple metabolisms constrain the anaerobic nitrite budget in the Eastern Tropical South Pacific, *Global Biogeochem. Cycles*, 31, 258-271, 2017.
- Beeckman F., Motte H. and Beeckman T.: Nitrification in agricultural soils: impact, actors and mitigation, *Curr. Opin. Biotechnol.*, 50, 166-173, 2018.
- 900 Bock E., Wilderer, P. A. and Freitag A.: Growth of *Nitrobacter* in the absence of dissolved oxygen, *Water Res.*, 22, 245-250, 1988.
- Brunner B., Contreras S., Lehmann M. F., Matantseva O., Rollog M., Kalvelage T., Klockgether G., Lavik G., Jetten M. S., Kartal B. and Kuypers M. M.: Nitrogen isotope effects induced by anammox bacteria, *Proc. Natl. Acad. Sci. U.S.A.*, 110, 18994-18999, 2013.

- 905 Buchwald C. and Casciotti K. L.: Oxygen isotopic fractionation and exchange during bacterial nitrite oxidation, *Limnol. Oceanogr.*, 55, 1064-1074, 2010.
- Buchwald C., Grabb K., Hansel C. M. and Wankel S. D.: Constraining the role of iron in environmental nitrogen transformations: dual stable isotope systematics of abiotic  $\text{NO}_2^-$  reduction by Fe (II) and its production of  $\text{N}_2\text{O}$ , *Geochim. Cosmochim. Acta*, 186, 1-12, 2016.
- 910 Buchwald C., Homola K., Spivack A. J., Estes E. R., Murray R. W. and Wankel S. D.: Isotopic constraints on nitrogen transformation rates in the deep sedimentary marine biosphere, *Global Biogeochem. Cycles*, 32, 1688-1702, 2018.
- Buessecker S., Tylor K., Nye J., Holbert K. E., Muñoz J. D. U., Glass J. B., Hartnett H. E. and Cadillo-Quiroz H.: Effects of sterilization techniques on chemodenitrification and  $\text{N}_2\text{O}$  production in tropical peat soil microcosms, *Biogeosciences*, 16, 4601-4612, 2019.
- 915 Calvert J. G., Lazrus A., Kok G. L., Heikes B. G., Walega J. G., Lind J. and Cantrell C. A.: Chemical mechanisms of acid generation in the troposphere, *Nature*, 317, 27-35, 1985.
- Caranto J. D. and Lancaster K. M.: Nitric oxide is an obligate bacterial nitrification intermediate produced by hydroxylamine oxidoreductase, *Proc. Natl. Acad. Sci. U.S.A.* 114, 8217-8222.
- Casciotti K. L.: Inverse kinetic isotope fractionation during bacterial nitrite oxidation, *Geochim. Cosmochim. Acta*, 73, 2061-2076, 2009.
- 920 Casciotti K. L., Böhlke J. K., McIlvin M. R., Mroczkowski S. J. and Hannon J. E.: Oxygen isotopes in nitrite: analysis, calibration, and equilibration, *Anal. Chem.*, 79, 2427-2436, 2007.
- Casciotti K. L., Sigman D. M., Hastings M. G., Böhlke J. K. and Hilkert A.: Measurement of the oxygen isotopic composition of nitrate in seawater and freshwater using the denitrifier method, *Anal. Chem.*, 74, 4905-4912, 2002.
- 925 Casciotti K. L., Sigman D. M. and Ward B. B.: Linking diversity and stable isotope fractionation in ammonia-oxidizing bacteria, *Geomicrobiol. J.*, 20, 335-353, 2003.
- Crutzen P. J.: The role of  $\text{NO}$  and  $\text{NO}_2$  in the chemistry of the troposphere and stratosphere, *Annu. Rev. Earth and Planet. Sci.*, 7, 443-472, 1979.
- 930 Davidson E.A.: The contribution of manure and fertilizer nitrogen to atmospheric nitrous oxide since 1860, *Nat. Geosci.*, 2, 659-662, 2009.
- Dähnke K. and Thamdrup B.: Isotope fractionation and isotope decoupling during anammox and denitrification in marine sediments, *Limnol. Oceanogr.*, 61, 610-624, 2016.
- 935 Dale A. W., Sommer S., Ryabenko E., Noffke A., Bohlen L., Wallmann K., Stolpovsky K., Greinert J. and Pfannkuche O.: Benthic nitrogen fluxes and fractionation of nitrate in the Mauritanian oxygen minimum zone (Eastern Tropical North Atlantic), *Geochim. Cosmochim. Acta*, 134, 234-256, 2014.
- Davidson E. A. and Verchot L. V.: Testing the hole-in-the-pipe model of nitric and nitrous oxide emissions from soils using the TRAGNET database, *Global Biogeochem. Cycles*, 14, 1035-1043, 2000.

- Denk T. R., Mohn J., Decock C., Lewicka-Szczebak D., Harris E., Butterbach-Bahl K., Kiese R., and Wolf B.: The nitrogen cycle: A review of isotope effects and isotope modeling approaches, *Soil Biol. Biochem.*, 105, 121-137, 2017.
- Felix D. J., Elliott E. M., Gish T. J., McConnell L. L. and Shaw S. L.: Characterizing the isotopic composition of atmospheric ammonia emission sources using passive samplers and a combined oxidation-bacterial denitrifier approach, *Rapid Commun. Mass Spectrom.*, 27, 2239-2246, 2013.
- 945 Firestone M. K. and Davidson E. A.: Microbiological basis of NO and N<sub>2</sub>O production and consumption in soil. In *Exchange of trace gases between terrestrial ecosystems and the atmosphere*; Andreae, M. O.; Schimel, D. S.; Robertson, G. P. Eds.; John Wiley & Sons Ltd: Berlin, pp 7-21, 1989.
- Freitag A., Rudert M. and Bock E.: Growth of *Nitrobacter* by dissimilatory nitrate reduction, *FEMS Microbiol. Lett.*, 48, 105-109, 1987.
- 950 Friedman S. H., Massefski W. and Hollocher T. C.: Catalysis of intermolecular oxygen atom transfer by nitrite dehydrogenase of *Nitrobacter agilis*, *J. Biol. Chem.*, 261, 10538-10543, 1986.
- Fry B.: *Stable Isotope Ecology* (Vol. 521). New York: Springer, 2006.
- Galloway J. N., Aber J. D., Erisman J. W., Seitzinger S. P., Howarth R. W., Cowling E. B. and Cosby B. J.: The nitrogen cascade, *Bioscience*, 53, 341-356, 2003.
- 955 Gaye B., Nagel B., Dähnke K., Rixen T. and Emeis K.C.: Evidence of parallel denitrification and nitrite oxidation in the ODZ of the Arabian Sea from paired stable isotopes of nitrate and nitrite, *Global Biogeochem. Cycles*, 27, 1059-1071, 2013.
- Granger J. and Sigman D. M.: Removal of nitrite with sulfamic acid for nitrate N and O isotope analysis with the denitrifier method, *Rapid Commun. Mass Spectrom.*, 23, 3753-3762, 2009.
- 960 Granger J., Sigman D. M., Lehmann M. F. and Tortell P. D.: Nitrogen and oxygen isotope fractionation during dissimilatory nitrate reduction by denitrifying bacteria, *Limnol. Oceanogr.*, 53, 2533-2545, 2008.
- Granger J. and Wankel S. D.: Isotopic overprinting of nitrification on denitrification as a ubiquitous and unifying feature of environmental nitrogen cycling, *Proc. Natl. Acad. Sci. U.S.A.*, 113, E6391-E6400, 2016.
- Heil J., Vereecken H. and Brüggemann N.: A review of chemical reactions of nitrification intermediates and their role in nitrogen cycling and nitrogen trace gas formation in soil, *Eur. J. Soil Sci.*, 67, 23-39, 2016.
- 965 Højberg O., Binnerup S. J. and Sørensen J.: Potential rates of ammonium oxidation, nitrite oxidation, nitrate reduction and denitrification in the young barley rhizosphere, *Soil Biol. Biochem.*, 28, 47-54, 1996.
- Homyak P. M., Vasquez K. T., Sickman J. O., Parker D. R. and Schimel J. P.: Improving nitrite analysis in soils: Drawbacks of the conventional 2 M KCl extraction, *Soil Sci. Soc. Am. J.*, 79, 1237-1242, 2015.
- 970 Hooper A. B., Arciero D., Bergmann D. and Hendrich M. P.: The Oxidation of Ammonia as an Energy Source in Bacteria. In *Respiration in archaea and bacteria* (pp. 121-147). Springer, Dordrecht, 2004.
- Hudman R. C., Moore N. E., Mebus A. K., Martin R. V., Russell A. R., Valin L. C. and Cohen R. C.: Steps towards a mechanistic model of global soil nitric oxide emissions: implementation and space based-constraints, *Atmos. Chem. Phys.*, 12, 7779-7795, 2012.

- 975 Hudman R. C., Russell A. R., Valin L. C. and Cohen R. C.: Interannual variability in soil nitric oxide emissions over the United States as viewed from space, *Atmos. Chem. Phys.*, 10, 9943-9952, 2010.
- Jones L. C., Peters B., Lezama Pacheco J. S., Casciotti K. L. and Fendorf S.: Stable isotopes and iron oxide mineral products as markers of chemodenitrification, *Environ. Sci. Technol.*, 49, 3444-3452, 2015.
- Kaiser J., Hastings M. G., Houlton B. Z., Röckmann T. and Sigman D. M.: Triple oxygen isotope analysis of nitrate using the denitrifier method and thermal decomposition of N<sub>2</sub>O, *Anal. Chem.*, 79, 599-607, 2007.
- 980 Kaneko M. and Poulson S. R.: The rate of oxygen isotope exchange between nitrate and water, *Geochim. Cosmochim. Acta*, 118, 148-156, 2013.
- Kang H., Stanley E. H. and Park S. S.: A sensitive method for the measurement of ammonium in soil extract and water, *Commun. Soil Sci. Plant Anal.*, 34, 2193-2201, 2003.
- 985 Ke X., Angel R., Lu Y. and Conrad R.: Niche differentiation of ammonia oxidizers and nitrite oxidizers in rice paddy soil, *Environ. Microbiol.*, 15, 2275-2292, 2013.
- Keiluweit M., Gee K., Denney A. and Fendorf S.: Anoxic microsites in upland soils dominantly controlled by clay content, *Soil Biol. Biochem.*, 118, 42-50, 2018.
- Kemeny P. C., Weigand M. A., Zhang R., Carter B. R., Karsh K. L., Fawcett S. E. and Sigman D. M.: Enzyme-level interconversion of nitrate and nitrite in the fall mixed layer of the Antarctic Ocean, *Global Biogeochem. Cycles*, 30, 1069-1085, 2016.
- 990 Kester R. A., Meijer M. E., Libochant J. A., Boer W. D. and Laanbroek H. J.: Contribution of nitrification and denitrification to the NO and N<sub>2</sub>O emissions of an acid forest soil, a river sediment and a fertilized grassland soil, *Soil Biol. Biochem.*, 29, 1655-1664, 1997.
- 995 Koch H., Lüscher S., Albertsen M., Kitzinger K., Herbold C., Spieck E., Nielsen P. H., Wagner M. and Daims H.: Expanded metabolic versatility of ubiquitous nitrite-oxidizing bacteria from the genus *Nitrospira*, *Proc. Natl. Acad. Sci. U.S.A.*, 112, 11371-11376, 2015.
- Kool D. M., Wrage N., Oenema O., Van Kessel C. and Van Groenigen J. W.: Oxygen exchange with water alters the oxygen isotopic signature of nitrate in soil ecosystems, *Soil Biol. Biochem.*, 43, 1180-1185, 2011.
- 1000 Kozłowski J. A., Stieglmeier M., Schleper C., Klotz M. G. and Stein L. Y.: Pathways and key intermediates required for obligate aerobic ammonia-dependent chemolithotrophy in bacteria and Thaumarchaeota, *ISME J.*, 10, 1836-1845, 2016.
- Kremen A., Bear J., Shavit U. and Shavit A.: Model demonstrating the potential for coupled nitrification denitrification in soil aggregates, *Environ. Sci. Technol.*, 39, 4180-4188, 2005.
- 1005 Kuypers M. M., Marchant H. K. and Kartal B.: The microbial nitrogen-cycling network, *Nat. Rev. Microbiol.*, 16, 263, 2018.
- Lancaster K. M., Caranto J. D., Majer S. H. and Smith M. A.: Alternative bioenergy: updates to and challenges in nitrification metalloenzymology, *Joule*, 2, 421-441, 2018.
- Le Roux X., Bouskill N. J., Niboyet A., Barthes L., Dijkstra P., Field C. B., Hungate B. A., Lerondelle C., Pommier T., Tang J. and Terada A.: Predicting the responses of soil nitrite-oxidizers to multi-factorial global change: a trait-based approach, *Front. Microbiol.*, 7, 628, 2016.
- 1010

- Lehnert N., Dong H. T., Harland J. B., Hunt A. P. and White C. J.: Reversing nitrogen fixation, *Nat. Rev. Chem.*, 2, 278-289, 2018.
- 1015 Lewicka-Szczebak D., Dyckmans J., Kaiser J., Marca A., Augustin J. and Well R.: Oxygen isotope fractionation during N<sub>2</sub>O production by soil denitrification. *Biogeosciences*, 13, 1129-1144, 2016.
- Lewicka-Szczebak D., Well R., Köster J. R., Fuß R., Senbayram M., Dittert K. and Flessa H.: Experimental determinations of isotopic fractionation factors associated with N<sub>2</sub>O production and reduction during denitrification in soils, *Geochim. Cosmochim. Acta*, 134, 55-73, 2014.
- 1020 Li D. and Wang X.: Nitrogen isotopic signature of soil-released nitric oxide (NO) after fertilizer application, *Atmos. Environ.*, 42, 4747-4754, 2008.
- Lim N. Y., Frostegård Å. and Bakken L. R.: Nitrite kinetics during anoxia: The role of abiotic reactions versus microbial reduction, *Soil Biol. Biochem.*, 119, 203-209, 2018.
- Liu S., Lin F., Wu S., Ji C., Sun Y., Jin Y., Li S., Li Z. and Zou J.: A meta-analysis of fertilizer-induced soil NO and combined NO+N<sub>2</sub>O emissions, *Global Change Biol.*, 23, 2520-2532, 2017.
- 1025 Loick N., Dixon E. R., Abalos D., Vallejo A., Matthews G. P., McGeough K. L., Well R., Watson C. J., Laughlin R. J. and Cardenas L. M.: Denitrification as a source of nitric oxide emissions from incubated soil cores from a UK grassland soil, *Soil Biol. Biochem.*, 95, 1-7, 2016.
- Maaz T. M., Waldo S., Bruulsema T. and Mikkelsen R.: Inconsistencies undermine the conclusion that agriculture is a dominant source of NO<sub>x</sub> in California, *Sci. Adv.*, 4, 4706, 2018.
- 1030 Maggi F. and Riley W. J.: Mathematical treatment of isotopologue and isotopomer speciation and fractionation in biochemical kinetics, *Geochim. Cosmochim. Acta*, 74, 1823-1835, 2010.
- Mariotti A., Germon J. C., Hubert P., Kaiser P., Letolle R., Tardieux A., Tardieux P.: Experimental determination of nitrogen kinetic isotope fractionation: some principles; illustration for the denitrification and nitrification processes, *Plant Soil*, 62, 413-430, 1981.
- 1035 Mariotti A., Leclerc A. and Germon J. C.: Nitrogen isotope fractionation associated with the NO<sub>2</sub><sup>-</sup> → N<sub>2</sub>O step of denitrification in soils, *Can. J. Soil Sci.*, 62, 227-241, 1982.
- Martin T. S. and Casciotti K. L.: Nitrogen and oxygen isotopic fractionation during microbial nitrite reduction, *Limnol. Oceanogr.*, 61, 1134-1143, 2016.
- Martin T. S. and Casciotti K. L.: Paired N and O isotopic analysis of nitrate and nitrite in the Arabian Sea oxygen deficient zone, *Deep Sea Res. Part I*, 121, 121-131, 2017.
- 1040 McKenney D. J., Lazar C. and Findlay W. J.: Kinetics of the nitrite to nitric oxide reaction in peat, *Soil Sci. Soc. Am. J.*, 54, 106-112, 1990.
- McKenney D. J., Shuttleworth K. F., Vriesacker J. R. and Findlay W. I.: Production and loss of nitric oxide from denitrification in anaerobic Brookston clay, *Appl. Environ. Microbiol.*, 43, 534-541, 1982.
- 1045 Medinets S., Skiba U., Rennenberg H. and Butterbach-Bahl K.: A review of soil NO transformation: Associated processes and possible physiological significance on organisms, *Soil Biol. Biochem.*, 80, 92-117, 2015.
- Michalski G., Meixner T., Fenn M., Hernandez L., Sirulnik A., Allen E., Thiemens M.: Tracing atmospheric nitrate deposition in a complex semiarid ecosystem using Δ<sup>17</sup>O, *Environ. Sci. Technol.*, 38, 2175-2181, 2004.

Formatted: Font: (Default) +Headings (Times New Roman)

Formatted: Font: (Default) +Headings (Times New Roman)

Formatted: Font: (Default) +Headings (Times New Roman), Subscript

Formatted: Font: (Default) +Headings (Times New Roman)

Formatted: Font: (Default) +Headings (Times New Roman), Not Italic

Formatted: Font: (Default) +Headings (Times New Roman)

Formatted: Font color: Auto



- 1050 Miller D. J., Chai J., Guo F., Dell C. J., Karsten H. and Hastings M. G.: Isotopic Composition of In Situ Soil NO<sub>x</sub> Emissions in Manure-Fertilized Cropland, *Geophys. Res. Lett.*, 45, 12-058, 2018.
- Peters B. D., Babbin A. R., Lettmann K. A., Mordy C. W., Ulloa O., Ward B. B. and Casciotti K. L.: Vertical modeling of the nitrogen cycle in the eastern tropical South Pacific oxygen deficient zone using high-resolution concentration and isotope measurements, *Global Biogeochem. Cycles*, 30, 1661-1681, 2016.
- 1055 Russow R., Stange C. F. and Neue H. U.: Role of nitrite and nitric oxide in the processes of nitrification and denitrification in soil: Results from <sup>15</sup>N tracer experiments, *Soil Biol. Biochem.*, 41, 785-795, 2009.
- Santoro A. E. and Casciotti K. L.: Enrichment and characterization of ammonia-oxidizing archaea from the open ocean: phylogeny, physiology and stable isotope fractionation, *ISME J.* 5, 1796, 2011.
- Shoun H., Fushinobu S., Jiang L., Kim S. W. and Wakagi T.: Fungal denitrification and nitric oxide reductase cytochrome P450nor, *Philos. Trans. R. Soc. Ser. B*, 367, 1186-1194, 2012.
- 1060 Sigman D. M., Casciotti K. L., Andreani M., Barford C., Galanter M. B. J. K. and Böhlke J. K.: A bacterial method for the nitrogen isotopic analysis of nitrate in seawater and freshwater, *Anal. Chem.*, 73, 4145-4153, 2001.
- Skiba U., Fowler D. and Smith K. A.: Nitric oxide emissions from agricultural soils in temperate and tropical climates: sources, controls and mitigation options, *Nutr. Cycling Agroecosyst.*, 48, 139-153, 1997.
- Stange C. F., Spott O., Arriaga H., Menéndez S., Estavillo J. M. and Merino P.: Use of the inverse abundance approach to identify the sources of NO and N<sub>2</sub>O release from Spanish forest soils under oxic and hypoxic conditions, *Soil Biol. Biochem.*, 57, 451-458, 2013.
- 1065 Stein L. Y.: Insights into the physiology of ammonia-oxidizing microorganisms, *Curr. Opin. Chem. Biol.*, 49, 9-15, 2019.
- Sun X., Ji Q., Jayakumar A. and Ward B. B.: Dependence of nitrite oxidation on nitrite and oxygen in low-oxygen seawater, *Geophys. Res. Lett.*, 44, 7883-7891, 2017.
- 1070 Sutka R. L., Ostrom N. E., Ostrom P. H., Breznak J. A., Gandhi H., Pitt A. J. and Li F.: Distinguishing nitrous oxide production from nitrification and denitrification on the basis of isotopomer abundances, *Appl. Environ. Microbiol.*, 72, 638-644, 2006.
- Taylor A. E., Myrold D. D. and Bottomley P. J.: Temperature affects the kinetics of nitrite oxidation and nitrification coupling in four agricultural soils, *Soil Biol. Biochem.*, 136, 107523, 2019.
- 1075 Toyoda S., Yoshida N. and Koba K.: Isotopocule analysis of biologically produced nitrous oxide in various environments, *Mass Spectrom. Rev.*, 36, 135-160, 2017.
- Treibergs L. A. and Granger J.: Enzyme level N and O isotope effects of assimilatory and dissimilatory nitrate reduction, *Limnol. Oceanogr.*, 62, 272-288, 2017.
- 1080 Van Cleemput O. and Samater A. H.: Nitrite in soils: accumulation and role in the formation of gaseous N compounds, *Fert. Res.*, 45, 81-89, 1995.
- Veldkamp E. and Keller M.: Fertilizer-induced nitric oxide emissions from agricultural soils, *Nutr. Cycling Agroecosyst.*, 48, 69-77, 1997.

- 1085 Venterea R. T., Coulter J. A. and Clough T. J.: Nitrite accumulation and nitrogen gas production increase with decreasing temperature in urea-amended soils: Experiments and modeling, *Soil Biol. Biochem.*, 142, 107727, 2020.
- Venterea R. T., Rolston D. E. E. and Cardon Z. G.: Effects of soil moisture, physical, and chemical characteristics on abiotic nitric oxide production, *Nutr. Cycling Agroecosyst.*, 72, 27-40, 2005.
- 1090 Vinken G. C. M., Boersma K. F., Maasackers J. D., Adon M. and Martin R. V.: Worldwide biogenic soil NO<sub>x</sub> emissions inferred from OMI NO<sub>2</sub> observations, *Atmos. Chem. Phys.*, 14, 10363-10381, 2014.
- Wei J., Ibraim E., Brüggemann N., Vereecken H. and Mohn J.: First real-time isotopic characterisation of N<sub>2</sub>O from chemodenitrification, *Geochim. Cosmochim. Acta*, 267, 17-32, 2019.
- Wrage-Mönnig N., Horn M. A., Well R., Müller C., Velthof G. and Oenema O.: The role of nitrifier denitrification in the production of nitrous oxide revisited, *Soil Biol. Biochem.* 123, A3-A16, 2018.
- 1095 Wunderlich A., Meckenstock R. U. and Einsiedl F.: A mixture of nitrite-oxidizing and denitrifying microorganisms affects the δ<sup>18</sup>O of dissolved nitrate during anaerobic microbial denitrification depending on the δ<sup>18</sup>O of ambient water, *Geochim. Cosmochim. Acta*, 119, 31-45, 2013.
- Yamazaki T., Hozuki T., Arai K., Toyoda S., Koba K., Fujiwara T. and Yoshida N.: Isotopomeric characterization of nitrous oxide produced by reaction of enzymes extracted from nitrifying and denitrifying
- 1100 bacteria, *Biogeosciences*, 11, 2679, 2014.
- Yang H., Gandhi H., Ostrom N. E. and Hegg E. L.: Isotopic fractionation by a fungal P450 nitric oxide reductase during the production of N<sub>2</sub>O, *Environ. Sci. Technol.*, 48, 10707-10715, 2014.
- Ye R. W., Averill B. A. and Tiedje J. M.: Denitrification: production and consumption of nitric oxide, *Appl. Environ. Microbiol.*, 60, 1053, 1994.
- 1105 Yu Z. and Elliott E. M.: Novel method for nitrogen isotopic analysis of soil-emitted nitric oxide, *Environ. Sci. Technol.*, 51, 6268-6278, 2017.
- Yu Z. and Elliott E. M.: Probing soil nitrification and nitrate consumption using Δ<sup>17</sup>O of soil nitrate, *Soil Biol. Biochem.*, 127, 187-199, 2018.
- Zhang L., Altabet M. A., Wu T. and Hadas O.: Sensitive measurement of NH<sub>4</sub><sup>+</sup> <sup>15</sup>N/<sup>14</sup>N (δ<sup>15</sup>NH<sub>4</sub><sup>+</sup>) at natural
- 1110 abundance levels in fresh and saltwaters, *Anal. Chem.*, 79, 5297-5303, 2007.
- Zhang S., Fang Y. and Xi D.: Adaptation of micro-diffusion method for the analysis of <sup>15</sup>N natural abundance of ammonium in samples with small volume, *Rapid Commun. Mass Spectrom.*, 29, 1297-1306, 2015.
- [Zhu-Barker X., Cavazos A. R., Ostrom N. E., Horwath W. R. and Glass J. B.: The importance of abiotic reactions for nitrous oxide production, \*Biogeochemistry\*, 126, 251-267, 2015.](#)
- 1115 Zumft W. G.: Cell biology and molecular basis of denitrification, *Microbiol. Mol. Biol. Rev.*, 61, 533-616, 1997.

## Tables

1120 Table 1. Means and 95% confidence intervals of modeled denitrification rates and NO<sub>2</sub><sup>-</sup> re-oxidation rate constants under the 'no exchange' and 'complete exchange' scenarios.

| Parameter           | Description                                                                                         | No exchange |                | Complete exchange |                |
|---------------------|-----------------------------------------------------------------------------------------------------|-------------|----------------|-------------------|----------------|
|                     |                                                                                                     | Mean        | 95% CI         | Mean              | 95% CI         |
| $R_{\text{NAR}}$    | Zero order rate for NO <sub>3</sub> <sup>-</sup> reduction (μg N·g <sup>-1</sup> ·h <sup>-1</sup> ) | 0.158       | 0.157 to 0.160 | 0.158             | 0.157 to 0.160 |
| $R_{\text{NIR}}$    | Zero order rate for NO <sub>2</sub> <sup>-</sup> reduction (μg N·g <sup>-1</sup> ·h <sup>-1</sup> ) | 0.112       | 0.111 to 0.113 | 0.112             | 0.111 to 0.113 |
| $R_{\text{NOR}}$    | Zero order rate for NO reduction (μg N·g <sup>-1</sup> ·h <sup>-1</sup> )                           | 0.039       | 0.038 to 0.040 | 0.039             | 0.038 to 0.040 |
| $k_{\text{NXR(b)}}$ | First order rate constant of NO <sub>2</sub> <sup>-</sup> re-oxidation (h <sup>-1</sup> )           | 0.64        | 0.61 to 0.66   | 0.25              | 0.24 to 0.26   |

1122 Table 2. Mean<sub>s</sub> and 95% confidence interval<sub>s</sub> of modeled gross N transformation rates, NO yield<sub>s</sub>, and net N isotope  
 1123 effects in the oxic and hypoxic incubations.

| Parameter                     | Description                                                                                                   | Oxic  |                | Hypoxic   |                 |
|-------------------------------|---------------------------------------------------------------------------------------------------------------|-------|----------------|-----------|-----------------|
|                               |                                                                                                               | Mean  | 95% CI         | Mean      | 95% CI          |
| $R_{OrgN/NH_4}$               | Zero order rate for net mineralization ( $\mu\text{g N}\cdot\text{g}^{-1}\cdot\text{h}^{-1}$ )                | 0.014 | 0.013 to 0.016 | 0.012     | -0.011 to 0.038 |
| $R_{NH_4/NO_3}$               | Zero order rate for gross nitrification ( $\mu\text{g N}\cdot\text{g}^{-1}\cdot\text{h}^{-1}$ )               | 0.458 | 0.455 to 0.460 | 0.111     | 0.110 to 0.113  |
| $R_{NO_3\text{comp}}$         | Zero order rate for gross $\text{NO}_3^-$ consumption ( $\mu\text{g N}\cdot\text{g}^{-1}\cdot\text{h}^{-1}$ ) | 0.071 | 0.070 to 0.072 | 0.070     | 0.049 to 0.091  |
| $^{15}\eta_{OrgN/NH_4}$       | Net N isotope effect for net mineralization                                                                   | 2‰    | -27 to 31‰     | 0‰        | -18 to 17‰      |
| $^{15}\eta_{NH_4/NO_3}$       | Net N isotope effect for gross nitrification                                                                  | 28‰   | 27 to 30‰      | 23‰       | 12 to 33‰       |
| $^{15}\eta_{NO_3\text{comp}}$ | Net N isotope effect for gross $\text{NO}_3^-$ consumption                                                    | 5‰    | -16 to 20‰     | 7‰        | -9 to 23‰       |
| $f_{NH_4}$                    | Fraction of net NO production from nitrification                                                              | 0.72  | 0.65 to 0.78   | 0.58      | 0.55 to 0.61    |
| $Y_{NH_4/NO}$                 | NO yield in nitrification                                                                                     | 1.3%  | 1.2 to 1.4%    | 5.2%      | 4.8 to 5.5%     |
| $Y_{NO_3/NO}$                 | NO yield in $\text{NO}_3^-$ consumption                                                                       | 3.2%  | 2.5 to 4.0%    | 6.1%      | 4.3 to 9.3%     |
| $^{15}\eta_{\text{comb}}$     | Combined net isotope effect for NO production from $\text{NH}_4^+$ and $\text{NO}_3^-$                        | 56‰   | 54 to 58‰      | 51‰       | 50 to 52‰       |
|                               |                                                                                                               | Mean  |                | 95% CI    |                 |
| $^{15}\eta_{NH_4/NO}$         | Net isotope effect for NO production from $\text{NH}_4^+$ oxidation                                           | 66‰   |                | 59 to 85‰ |                 |
| $^{15}\eta_{NO_3/NO}$         | Net isotope effect for NO production from $\text{NO}_3^-$ consumption                                         | 30‰   |                | 1 to 42‰  |                 |

1124

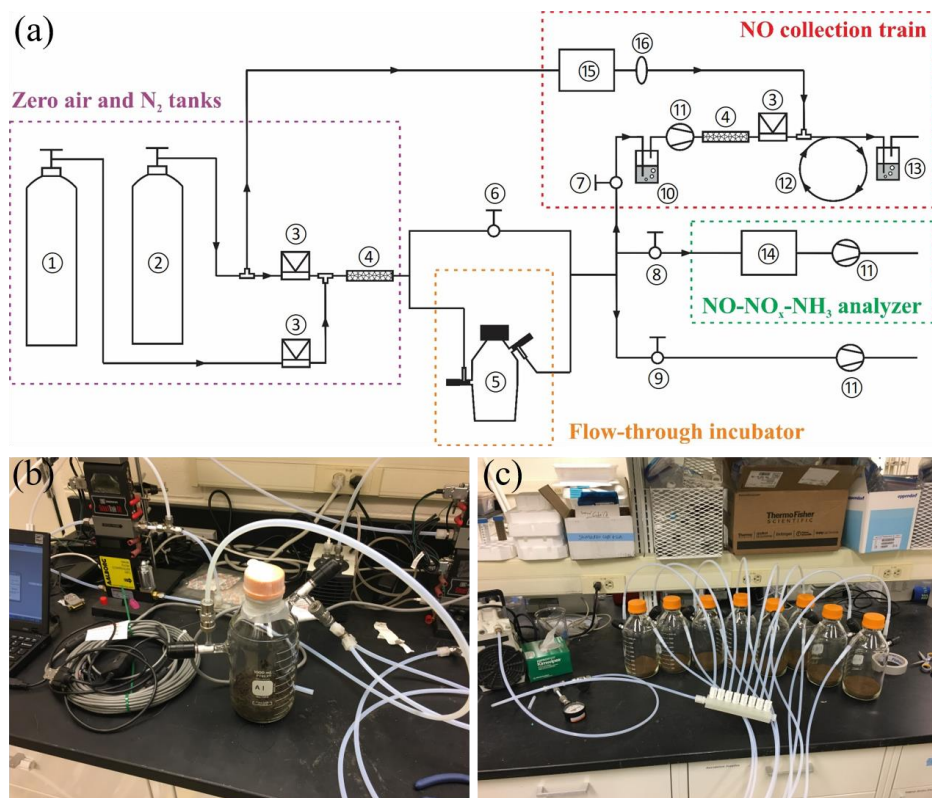

1126

1127 Figure 1. (a) Schematic of the DFC system (not to scale) consisting of the following: (1) zero air tank, (2) N<sub>2</sub> tank,  
 1128 (3) mass flow controller, (4) Nafion moisture exchanger, (5) flow-through incubator, (6) to (9) needle valves for  
 1129 controlling vacuum and flushing of the DFC system, (10) HONO scrubber, (11) diaphragm pump, (12) Teflon  
 1130 reaction tube, (13) gas washing bottle containing TEA solution, (14) NO-NO<sub>x</sub>-NH<sub>3</sub> analyzer, (15) O<sub>3</sub> generator, (16)  
 1131 in-line PTFE particulate filter assembly. (b) Photo of the flow-through incubator. (c) Photo of the Teflon purging  
 1132 manifold for connection of the incubators in parallel.

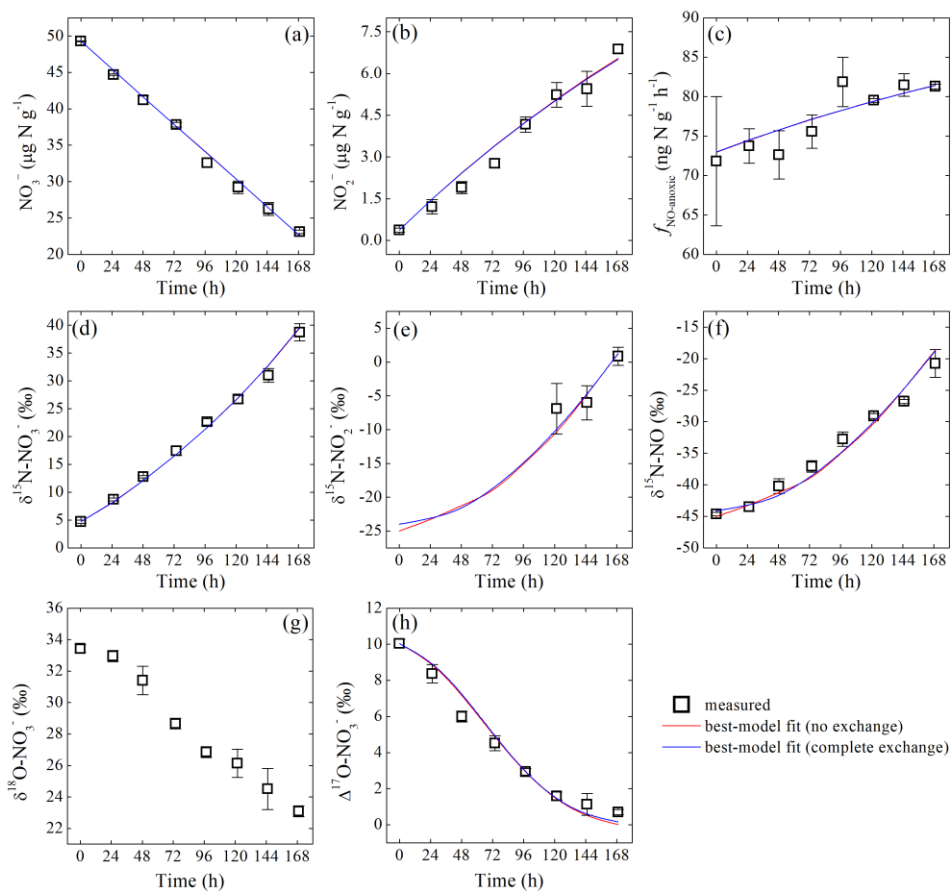

1133

1134 Figure 2. Measured and modeled concentrations of  $\text{NO}_3^-$  (a) and  $\text{NO}_2^-$  (b), net NO production rate (c),  
 1135  $\delta^{15}\text{N}$  values of  $\text{NO}_3^-$  (d),  $\text{NO}_2^-$  (e), and NO (f), and  $\delta^{18}\text{O}$  (g) and  $\Delta^{17}\text{O}$  (h) of  $\text{NO}_3^-$  during the anoxic  
 1136 incubation.

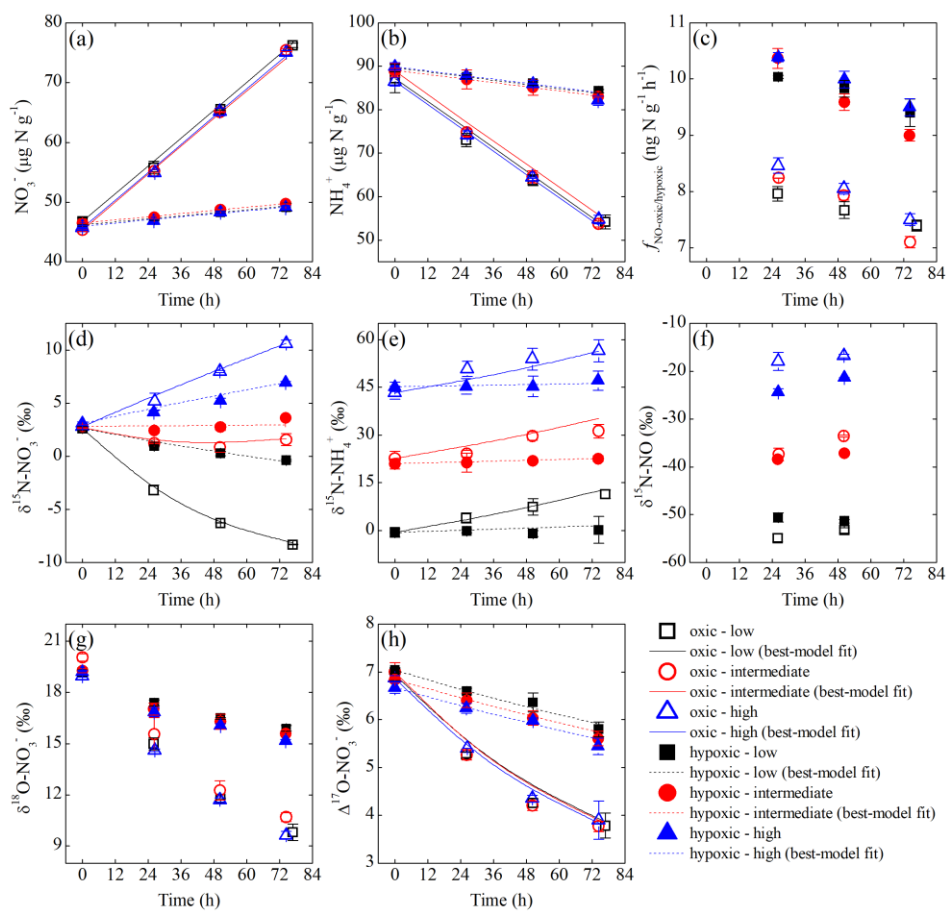

1137  
 1138 Figure 3. Measured and modeled concentrations of  $\text{NO}_3^-$  (a) and  $\text{NH}_4^+$  (b), net NO production rate (c),  
 1139  $\delta^{15}\text{N}$  values of  $\text{NO}_3^-$  (d) and  $\text{NH}_4^+$  (e), and NO (f), and  $\delta^{18}\text{O}$  (g) and  $\Delta^{17}\text{O}$  (h) of  $\text{NO}_3^-$  under the three  $\delta^{15}\text{N}$ -  
 1140  $\text{NH}_4^+$  treatments (differed by color) of the oxic (open symbols) and hypoxic (solid symbols) incubations.

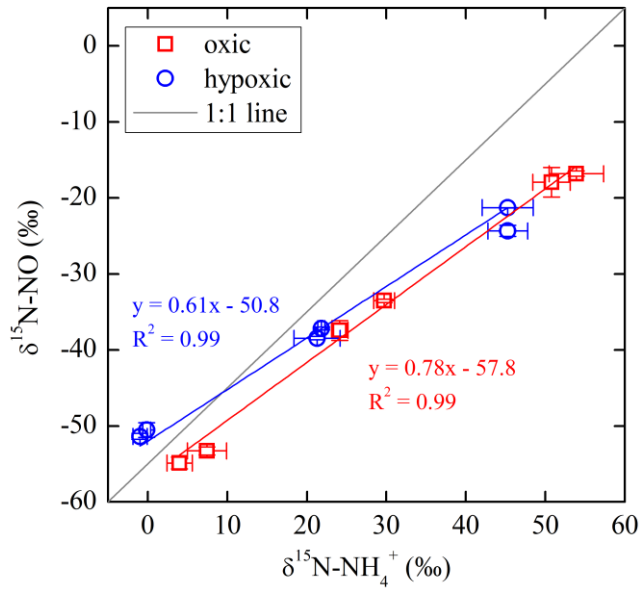

1141

1142 Figure 4.  $\delta^{15}\text{N-NO}$  as a function of  $\delta^{15}\text{N-NH}_4^+$  in the oxic and hypoxic incubations.



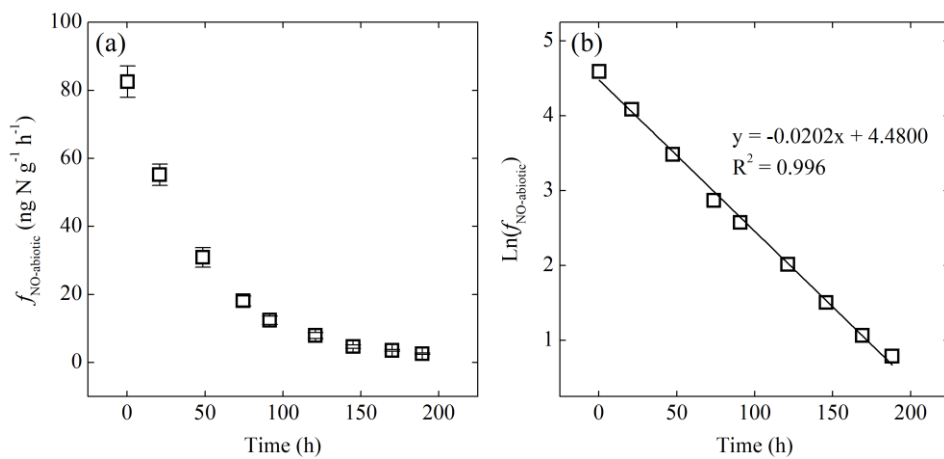

1143

1144 Figure 5 (a) Net NO production rate ( $f_{\text{NO-abiatic}}$ ) of the  $\text{NO}_2^-$ -amended sterilized soil as a function of time.

1145 (b) Plot of the natural logarithm of  $f_{\text{NO-abiatic}}$  versus time showing first-order decay of  $f_{\text{NO-abiatic}}$ .

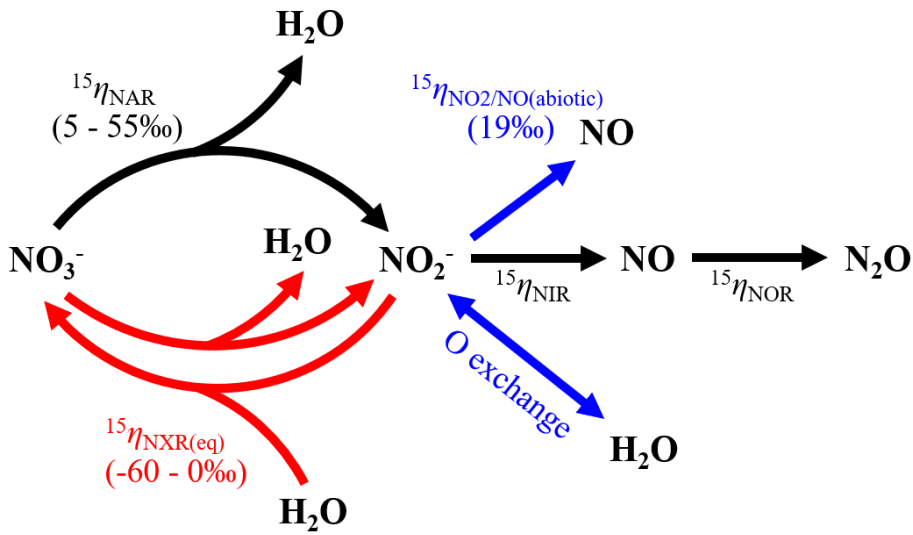

146

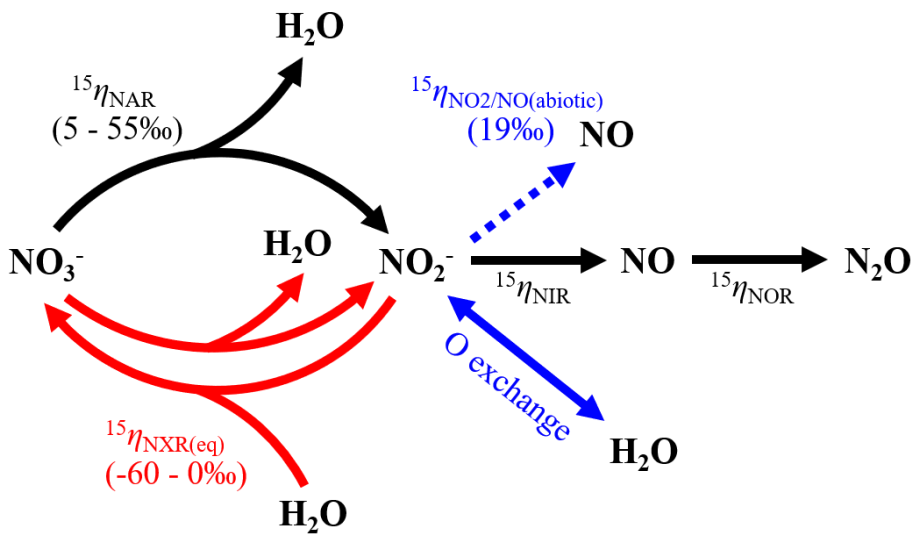

147

1148 Figure 6. Model structure of co-occurring denitrification and  $\text{NO}_2^-$  re-oxidation and associated N isotope  
 1149 effects. Nitrogen transformations driven by denitrifiers and nitrifiers are shown by solid black and red

Formatted: Normal, Left, Space After: 0 pt, Line spacing: single  
 Formatted: Font: 10 pt, Bold

150 arrows, respectively, and abiotic O exchange between  $\text{NO}_2^-$  and  $\text{H}_2\text{O}$  by solid blue arrow. Dashed blue  
151 arrow denotes net NO yield from abiotic  $\text{NO}_2^-$  reactions.

Formatted: Subscript

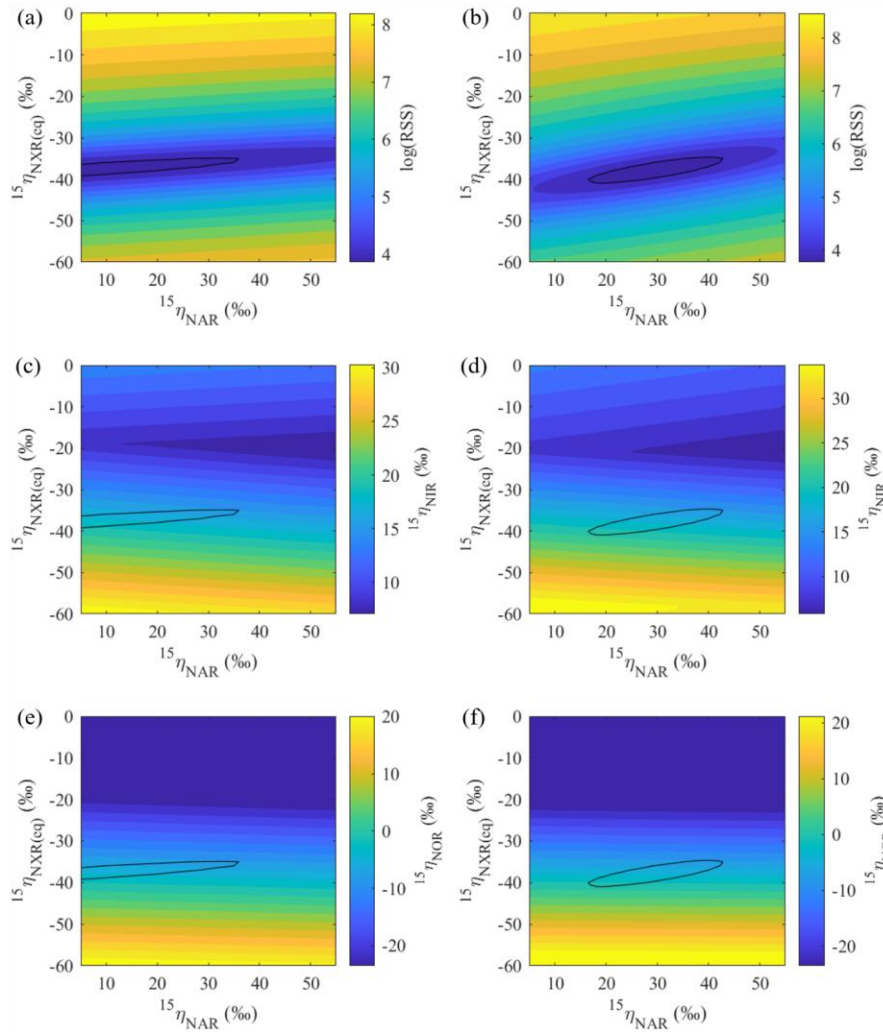

1152

1153 Figure 7. Contour maps showing variations in error-weighted residual sum of squares (RSS) between simulated and  
 1154 measured  $\delta^{15}\text{N}$  values, modeled  $^{15}\eta_{\text{NIR}}$ , and modeled  $^{15}\eta_{\text{NOR}}$  as a function of prescribed  $^{15}\eta_{\text{NAR}}$  and  $^{15}\eta_{\text{NXR}}$  under the  
 1155 ‘no exchange’ (a, c, and e) and ‘complete exchange’ (b, d, and f) model scenarios. Bold contour lines encompass the  
 1156 best-fit models defined by the lower 2.5th percentile of the error-weighted RSS.

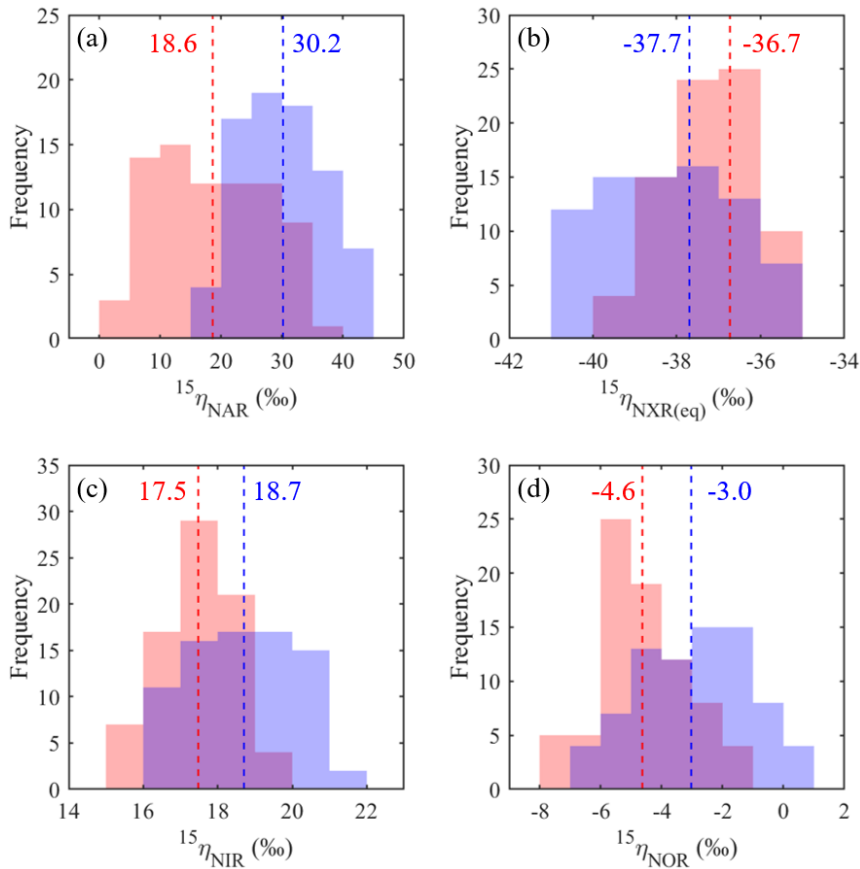

1157

1158 Figure 8. Frequency distributions of the best-fit  $^{15}\eta_{\text{NAR}}$  (a),  $^{15}\eta_{\text{NXR(eq)}}$  (b),  $^{15}\eta_{\text{NIR}}$  (c), and  $^{15}\eta_{\text{NOR}}$  (d) under the 'no  
 1159 exchange' (red) and 'complete exchange' (blue) model scenarios. Dashed vertical lines denote the RSS-weighted  
 1160 mean  $^{15}\eta$  values from the best-fit models under the two model scenarios.

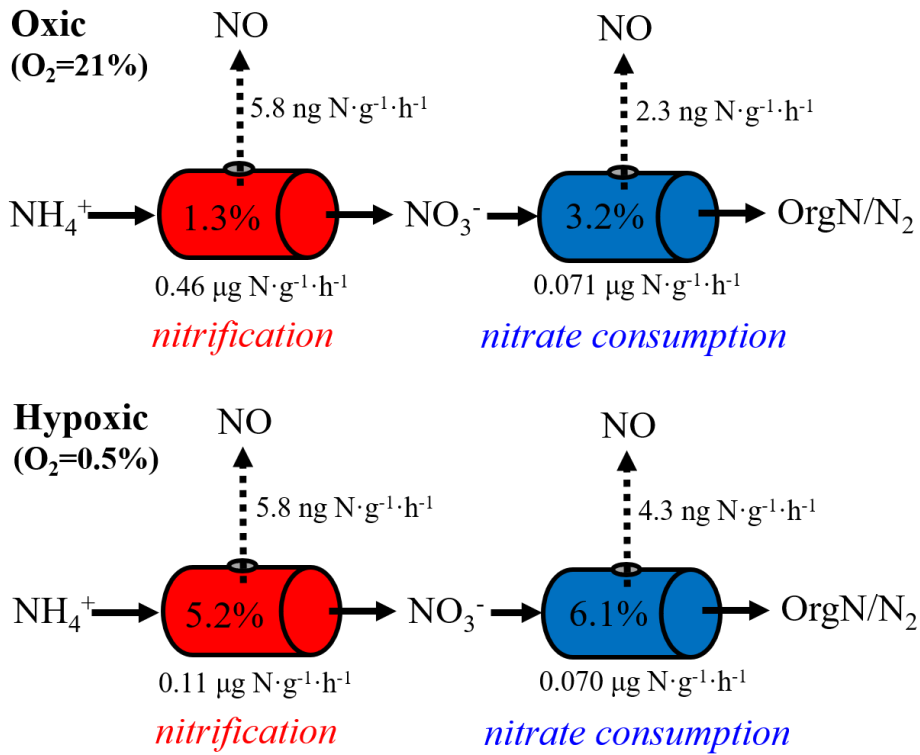

1161

1162 Figure 9. "Hole-in-the-pipe" illustration of NO production from gross nitrification and NO<sub>3</sub><sup>-</sup> consumption under oxic  
 1163 and hypoxic conditions. "OrgN" denotes organic nitrogen.

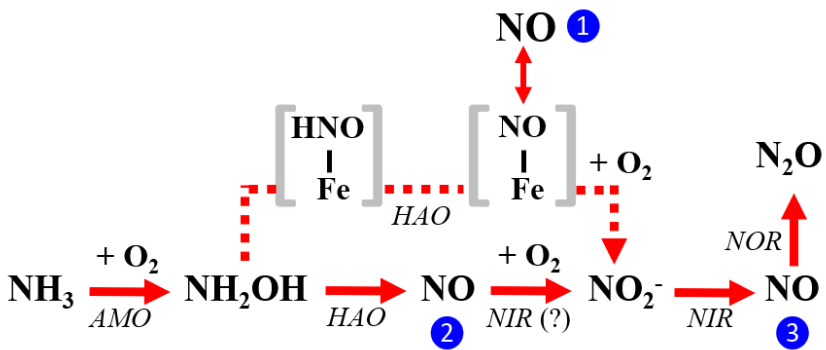

1164

1165 Figure 10. Three enzymatic pathways for NO production during NH<sub>3</sub> oxidation to NO<sub>2</sub><sup>-</sup> by AOB: the  
 1166 'NH<sub>2</sub>OH obligatory intermediate' pathway indicated by blue circle (1), the 'NH<sub>2</sub>OH/NO obligatory  
 1167 intermediate' pathway indicated by blue circle (2), and 'nitrifier-denitrification' pathway indicated by  
 1168 blue circle (3). Square brackets enclose proposed enzyme-bound intermediates [HNO-Fe] and [NO-Fe] of  
 1169 the 'NH<sub>2</sub>OH obligatory intermediate' pathway. The role of AOB-encoded nitrite reductase (NIR) in  
 1170 catalyzing NO oxidation to NO<sub>2</sub><sup>-</sup> in the 'NH<sub>2</sub>OH/NO obligatory intermediate' pathway is hypothetical.

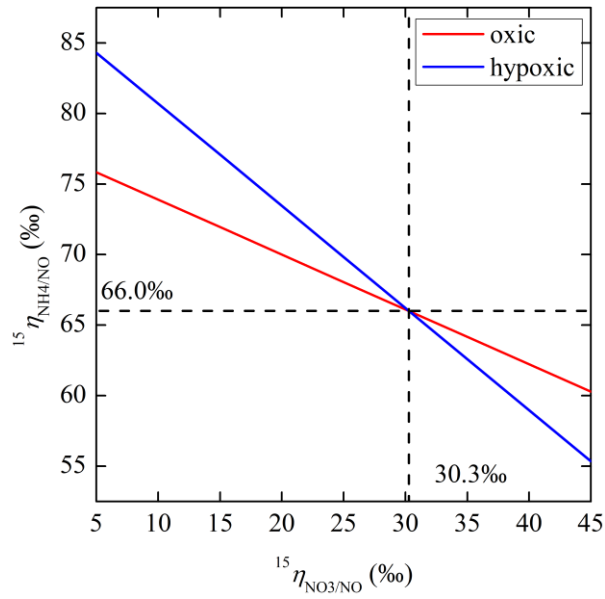

1171  
 1172 Figure 11. Relative magnitude of net N isotope effects for NO production from  $\text{NH}_4^+$  oxidation ( $^{15}\eta_{\text{NH}_4/\text{NO}}$ )  
 1173 and  $\text{NO}_3^-$  consumption ( $^{15}\eta_{\text{NO}_3/\text{NO}}$ ) in the oxic and hypoxic incubations.



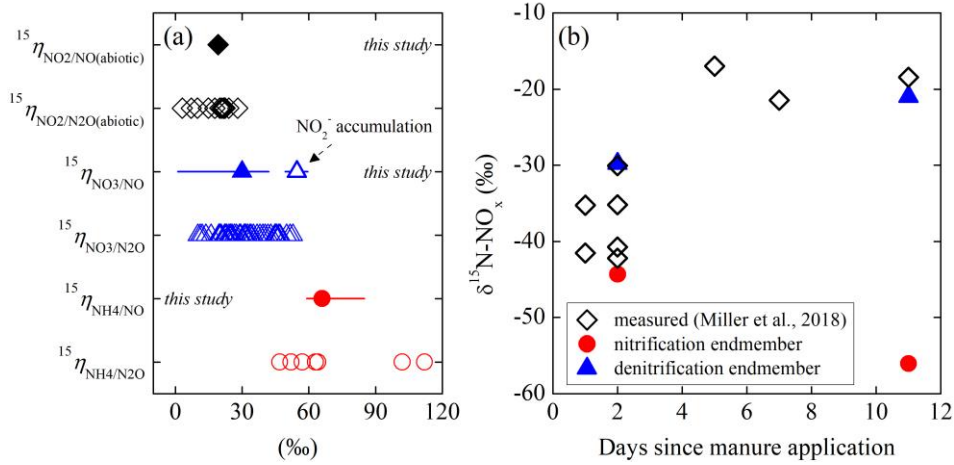

1174  
 1175 Figure 12. (a) Comparison of net isotope effects for NO production estimated in this study to net isotope  
 1176 effects for N<sub>2</sub>O production reported in the literature. (b) Comparison of in situ  $\delta^{15}\text{N}$  of NO<sub>x</sub> emission from  
 1177 a manure-fertilized soil (reported by Miller et al. (2018)) to nitrification and denitrification  $\delta^{15}\text{N-NO}$   
 1178 endmembers derived using the estimated net isotope effects for NO production in the oxic and hypoxic  
 1179 incubations.
